# Supplementary material for: Analysis of the Energy, Environmental and Economic Efficiency of Multi-Family Residential Buildings in Poland
Source: MDPI journal article supplement (doi:10.3390/en17092057), 2024-04-26
Supplement: s1 [file s1]

## Supplementary materials

**Table S1.** Annual usable energy demand for heating  $EU_H$  [kWh/(m<sup>2</sup> · year)] for the adopted building in six energy classes and 59 locations in Poland.

| No | Location      | Climate zone | Annual usable energy demand for heating $EU_H$<br>[kWh/(m <sup>2</sup> · year)] |          |          |          |          |          |
|----|---------------|--------------|---------------------------------------------------------------------------------|----------|----------|----------|----------|----------|
|    |               |              | Class A1                                                                        | Class A2 | Class A3 | Class B1 | Class B2 | Class B3 |
| 1  | Białystok     | 4            | 16.54                                                                           | 21.89    | 34.73    | 26.56    | 32.45    | 46.02    |
| 2  | Bielsko-Biała | 3            | 9.97                                                                            | 13.95    | 24.24    | 17.68    | 22.44    | 33.81    |
| 3  | Bydgoszcz     | 2            | 11.04                                                                           | 15.55    | 26.92    | 19.70    | 24.90    | 37.25    |
| 4  | Chojnice      | 2            | 14.30                                                                           | 19.30    | 31.80    | 23.85    | 29.58    | 42.92    |
| 5  | Częstochowa   | 3            | 12.20                                                                           | 16.56    | 27.38    | 20.50    | 25.49    | 37.25    |
| 6  | Elbląg        | 2            | 13.29                                                                           | 18.10    | 30.14    | 22.48    | 28.00    | 40.94    |
| 7  | Gdańsk        | 1            | 8.94                                                                            | 12.89    | 22.90    | 16.57    | 21.17    | 32.19    |
| 8  | Gorzów Wielk. | 2            | 10.70                                                                           | 14.86    | 25.43    | 18.72    | 23.56    | 35.00    |
| 9  | Hel           | 1            | 10.04                                                                           | 14.20    | 24.77    | 18.07    | 22.93    | 34.59    |
| 10 | Jelenia Góra  | 3            | 10.86                                                                           | 19.77    | 26.17    | 19.13    | 29.50    | 36.41    |
| 11 | Kalisz        | 2            | 11.96                                                                           | 16.57    | 28.04    | 20.75    | 26.03    | 38.48    |
| 12 | Katowice      | 3            | 12.22                                                                           | 16.73    | 27.61    | 20.70    | 25.73    | 37.51    |
| 13 | Kętrzyn       | 4            | 16.84                                                                           | 22.02    | 34.35    | 26.49    | 32.17    | 45.36    |
| 14 | Kielce        | 3            | 12.80                                                                           | 17.58    | 29.21    | 21.81    | 27.16    | 39.71    |
| 15 | Kłodzko       | 3            | 11.20                                                                           | 15.52    | 26.54    | 19.53    | 24.60    | 36.64    |
| 16 | Koło          | 2            | 9.50                                                                            | 13.58    | 23.81    | 17.32    | 22.03    | 33.24    |
| 17 | Kołobrzeg     | 1            | 8.36                                                                            | 12.21    | 22.65    | 16.03    | 20.79    | 32.17    |
| 18 | Koszalin      | 1            | 11.28                                                                           | 15.61    | 26.70    | 19.66    | 24.74    | 36.73    |
| 19 | Kraków        | 3            | 11.76                                                                           | 16.29    | 27.26    | 20.30    | 25.35    | 32.12    |
| 20 | Krosno        | 3            | 12.03                                                                           | 16.57    | 28.05    | 20.74    | 25.99    | 38.17    |
| 21 | Legnica       | 2            | 8.80                                                                            | 12.60    | 22.31    | 16.16    | 20.63    | 31.34    |
| 22 | Lesko         | 4            | 9.02                                                                            | 12.92    | 22.91    | 16.57    | 21.18    | 32.24    |
| 23 | Leszno        | 2            | 12.22                                                                           | 16.96    | 28.83    | 21.29    | 26.72    | 39.47    |
| 24 | Lębork        | 1            | 10.83                                                                           | 15.26    | 26.42    | 19.34    | 24.44    | 36.57    |
| 25 | Lublin        | 3            | 14.41                                                                           | 19.27    | 30.96    | 23.53    | 28.90    | 41.31    |
| 26 | Łeba          | 1            | 12.53                                                                           | 17.07    | 28.32    | 21.17    | 26.34    | 38.52    |
| 27 | Łódź          | 3            | 10.69                                                                           | 15.06    | 26.20    | 19.13    | 24.24    | 36.25    |
| 28 | Mikołajki     | 4            | 14.84                                                                           | 19.79    | 32.24    | 24.31    | 30.04    | 43.49    |
| 29 | Mława         | 3            | 14.08                                                                           | 19.01    | 31.06    | 23.41    | 28.93    | 41.76    |
| 30 | Nowy Sącz     | 3            | 7.82                                                                            | 11.80    | 22.06    | 15.57    | 20.27    | 31.53    |
| 31 | Olsztyn       | 4            | 15.28                                                                           | 20.59    | 33.77    | 25.39    | 31.42    | 45.30    |
| 32 | Opole         | 3            | 9.13                                                                            | 12.96    | 22.78    | 16.54    | 21.07    | 31.82    |
| 33 | Ostrołęka     | 3            | 13.22                                                                           | 18.28    | 30.53    | 22.75    | 28.37    | 41.40    |
| 34 | Piła          | 2            | 11.99                                                                           | 16.39    | 26.98    | 20.26    | 25.14    | 36.58    |
| 35 | Płock         | 3            | 12.60                                                                           | 17.07    | 27.92    | 21.02    | 26.02    | 32.75    |
| 36 | Poznań        | 2            | 11.37                                                                           | 15.97    | 27.38    | 20.15    | 25.37    | 37.48    |
| 37 | Przemyśl      | 3            | 13.75                                                                           | 18.53    | 30.26    | 22.79    | 28.18    | 40.74    |
| 38 | Racibórz      | 3            | 8.98                                                                            | 12.85    | 22.83    | 16.49    | 21.07    | 32.05    |
| 39 | Resko         | 1            | 10.67                                                                           | 14.59    | 24.55    | 18.22    | 22.82    | 33.81    |
| 40 | Rzeszów       | 3            | 12.18                                                                           | 17.03    | 29.05    | 21.42    | 26.91    | 39.73    |
| 41 | Sandomierz    | 3            | 10.31                                                                           | 14.61    | 25.45    | 18.58    | 23.54    | 35.28    |

| No | Location     | Climate zone | Annual usable energy demand for heating $EU_H$<br>[kWh/(m <sup>2</sup> · year)] |          |          |          |          |          |
|----|--------------|--------------|---------------------------------------------------------------------------------|----------|----------|----------|----------|----------|
|    |              |              | Class A1                                                                        | Class A2 | Class A3 | Class B1 | Class B2 | Class B3 |
| 42 | Siedlce      | 4            | 14.18                                                                           | 19.16    | 31.31    | 23.58    | 29.15    | 42.15    |
| 43 | Słubice      | 2            | 9.23                                                                            | 13.06    | 22.62    | 16.55    | 20.96    | 31.38    |
| 44 | Sulejów      | 2            | 11.39                                                                           | 15.93    | 27.26    | 20.07    | 25.27    | 37.51    |
| 45 | Suwałki      | 5            | 19.79                                                                           | 25.62    | 39.46    | 30.64    | 36.99    | 51.50    |
| 46 | Szczecin     | 1            | 8.85                                                                            | 12.83    | 23.12    | 16.61    | 21.32    | 32.55    |
| 47 | Szczecinek   | 1            | 11.02                                                                           | 15.39    | 26.50    | 19.43    | 24.54    | 36.67    |
| 48 | Świnoujście  | 1            | 7.92                                                                            | 11.55    | 20.99    | 15.01    | 19.35    | 35.48    |
| 49 | Tarnów       | 3            | 9.51                                                                            | 13.24    | 31.08    | 16.63    | 20.90    | 31.12    |
| 50 | Terespol     | 4            | 14.35                                                                           | 19.09    | 30.64    | 23.28    | 28.59    | 40.84    |
| 51 | Toruń        | 3            | 11.89                                                                           | 16.45    | 27.94    | 20.65    | 25.90    | 38.23    |
| 52 | Ustka        | 1            | 10.31                                                                           | 14.54    | 25.47    | 18.53    | 23.54    | 35.49    |
| 53 | Warszawa     | 3            | 14.43                                                                           | 15.26    | 26.32    | 19.28    | 24.36    | 36.43    |
| 54 | Wieluń       | 2            | 11.39                                                                           | 15.50    | 25.85    | 19.25    | 24.05    | 35.48    |
| 55 | Włodawa      | 3            | 15.28                                                                           | 20.23    | 32.07    | 24.53    | 29.99    | 42.65    |
| 56 | Wrocław      | 2            | 10.56                                                                           | 14.86    | 25.62    | 18.79    | 23.74    | 35.53    |
| 57 | Zakopane     | 5            | 12.70                                                                           | 18.08    | 31.64    | 23.03    | 29.24    | 43.72    |
| 58 | Zamość       | 3            | 12.92                                                                           | 17.82    | 30.10    | 22.28    | 27.92    | 41.10    |
| 59 | Zielona Góra | 2            | 11.33                                                                           | 15.95    | 27.32    | 20.12    | 25.33    | 37.37    |

**Table S2.** Annual final energy demand  $EK$  [kWh/(m<sup>2</sup> · year)] for a A1 energy class building.

| No | Location      | Climate zone | Annual final energy demand $EK$<br>[kWh/(m <sup>2</sup> · year)] |                             |             |                                   |
|----|---------------|--------------|------------------------------------------------------------------|-----------------------------|-------------|-----------------------------------|
|    |               |              | Heating<br>$EK_H$                                                | Hot utility<br>water $EK_W$ | Auxiliaries | Total final energy<br>demand $EK$ |
| 1  | Białystok     | 4            | 5.69                                                             | 15.42                       | 13.99       | 35.11                             |
| 2  | Bielsko-Biała | 3            | 3.43                                                             | 15.42                       | 13.87       | 32.72                             |
| 3  | Bydgoszcz     | 2            | 3.80                                                             | 15.42                       | 14.05       | 33.27                             |
| 4  | Chojnice      | 2            | 4.92                                                             | 15.42                       | 14.09       | 34.43                             |
| 5  | Częstochowa   | 3            | 4.20                                                             | 15.42                       | 13.92       | 33.54                             |
| 6  | Elbląg        | 2            | 4.57                                                             | 15.42                       | 14.04       | 34.04                             |
| 7  | Gdańsk        | 1            | 3.08                                                             | 15.42                       | 13.98       | 32.48                             |
| 8  | Gorzów Wielk. | 2            | 3.68                                                             | 15.42                       | 14.00       | 33.10                             |
| 9  | Hel           | 1            | 3.46                                                             | 15.42                       | 14.00       | 32.87                             |
| 10 | Jelenia Góra  | 3            | 3.74                                                             | 15.42                       | 13.94       | 33.10                             |
| 11 | Kalisz        | 2            | 4.11                                                             | 15.42                       | 14.00       | 33.54                             |
| 12 | Katowice      | 3            | 4.20                                                             | 15.42                       | 13.93       | 33.56                             |
| 13 | Kętrzyn       | 4            | 5.79                                                             | 15.42                       | 14.02       | 35.23                             |
| 14 | Kielce        | 3            | 4.40                                                             | 15.42                       | 14.01       | 33.83                             |
| 15 | Kłodzko       | 3            | 3.85                                                             | 15.42                       | 13.93       | 33.21                             |
| 16 | Koło          | 2            | 3.27                                                             | 15.42                       | 13.94       | 32.63                             |
| 17 | Kołobrzeg     | 1            | 2.87                                                             | 15.42                       | 13.98       | 32.28                             |
| 18 | Koszalin      | 1            | 3.88                                                             | 15.42                       | 14.00       | 33.30                             |
| 19 | Kraków        | 3            | 4.05                                                             | 15.42                       | 13.95       | 33.41                             |

| No | Location     | Climate zone | Annual final energy demand $E_K$<br>[kWh/(m <sup>2</sup> · year)] |                                |             |                                    |
|----|--------------|--------------|-------------------------------------------------------------------|--------------------------------|-------------|------------------------------------|
|    |              |              | Heating<br>$E_{K_H}$                                              | Hot utility<br>water $E_{K_W}$ | Auxiliaries | Total final energy<br>demand $E_K$ |
| 20 | Krosno       | 3            | 4.14                                                              | 15.42                          | 13.96       | 33.52                              |
| 21 | Legnica      | 2            | 3.03                                                              | 15.42                          | 13.92       | 32.37                              |
| 22 | Lesko        | 4            | 3.10                                                              | 15.42                          | 13.86       | 32.39                              |
| 23 | Leszno       | 2            | 4.20                                                              | 15.42                          | 14.04       | 33.67                              |
| 24 | Lębork       | 1            | 3.73                                                              | 15.42                          | 14.03       | 33.18                              |
| 25 | Lublin       | 3            | 4.96                                                              | 15.42                          | 13.99       | 34.37                              |
| 26 | Łeba         | 1            | 4.31                                                              | 15.42                          | 14.01       | 33.74                              |
| 27 | Łódź         | 3            | 3.68                                                              | 15.42                          | 14.01       | 33.11                              |
| 28 | Mikołajki    | 4            | 5.10                                                              | 15.42                          | 14.03       | 34.55                              |
| 29 | Mława        | 3            | 4.84                                                              | 15.42                          | 14.07       | 34.34                              |
| 30 | Nowy Sącz    | 3            | 2.69                                                              | 15.42                          | 13.97       | 32.08                              |
| 31 | Olsztyn      | 4            | 5.25                                                              | 15.42                          | 14.15       | 34.83                              |
| 32 | Opole        | 3            | 3.14                                                              | 15.42                          | 13.87       | 32.44                              |
| 33 | Ostrołęka    | 3            | 4.55                                                              | 15.42                          | 14.13       | 34.10                              |
| 34 | Piła         | 2            | 4.13                                                              | 15.42                          | 13.96       | 33.51                              |
| 35 | Płock        | 3            | 4.33                                                              | 15.42                          | 13.96       | 33.72                              |
| 36 | Poznań       | 2            | 3.91                                                              | 15.42                          | 14.04       | 33.37                              |
| 37 | Przemyśl     | 3            | 4.73                                                              | 15.42                          | 13.97       | 34.12                              |
| 38 | Racibórz     | 3            | 3.09                                                              | 15.42                          | 13.86       | 32.37                              |
| 39 | Resko        | 1            | 3.67                                                              | 15.42                          | 13.88       | 32.97                              |
| 40 | Rzeszów      | 3            | 4.19                                                              | 15.42                          | 14.02       | 33.63                              |
| 41 | Sandomierz   | 3            | 3.55                                                              | 15.42                          | 13.96       | 32.93                              |
| 42 | Siedlce      | 4            | 4.88                                                              | 15.42                          | 14.04       | 34.34                              |
| 43 | Słubice      | 2            | 3.18                                                              | 15.42                          | 13.88       | 32.48                              |
| 44 | Sulejów      | 2            | 3.92                                                              | 15.42                          | 14.01       | 33.35                              |
| 45 | Suwałki      | 5            | 6.81                                                              | 15.42                          | 13.92       | 36.15                              |
| 46 | Szczecin     | 1            | 3.04                                                              | 15.42                          | 13.99       | 32.46                              |
| 47 | Szczecinek   | 1            | 3.79                                                              | 15.42                          | 14.02       | 33.24                              |
| 48 | Świnoujście  | 1            | 2.72                                                              | 15.42                          | 13.88       | 32.03                              |
| 49 | Tarnów       | 3            | 3.27                                                              | 15.42                          | 13.79       | 32.48                              |
| 50 | Terespol     | 4            | 4.94                                                              | 15.42                          | 13.98       | 34.34                              |
| 51 | Toruń        | 3            | 4.09                                                              | 15.42                          | 14.05       | 33.56                              |
| 52 | Ustka        | 1            | 3.55                                                              | 15.42                          | 14.01       | 32.98                              |
| 53 | Warszawa     | 3            | 4.96                                                              | 15.42                          | 13.96       | 34.34                              |
| 54 | Wieluń       | 2            | 3.92                                                              | 15.42                          | 13.87       | 33.21                              |
| 55 | Włodawa      | 3            | 5.26                                                              | 15.42                          | 13.99       | 34.67                              |
| 56 | Wrocław      | 2            | 3.63                                                              | 15.42                          | 13.96       | 33.01                              |
| 57 | Zakopane     | 5            | 4.37                                                              | 15.42                          | 14.15       | 33.94                              |
| 58 | Zamość       | 3            | 4.45                                                              | 15.42                          | 14.05       | 33.91                              |
| 59 | Zielona Góra | 2            | 3.90                                                              | 15.42                          | 14.08       | 33.40                              |

**Table S3.** Annual final energy demand  $E_K$  [kWh/(m<sup>2</sup> · year)] for a A2 energy class building.

| No | Location      | Climate zone | Annual final energy demand EK<br>[kWh/(m <sup>2</sup> · year)] |                             |             |                                 |
|----|---------------|--------------|----------------------------------------------------------------|-----------------------------|-------------|---------------------------------|
|    |               |              | Heating<br>$EK_H$                                              | Hot utility<br>water $EK_W$ | Auxiliaries | Total final energy<br>demand EK |
| 1  | Białystok     | 4            | 7.53                                                           | 15.42                       | 10.71       | 33.66                           |
| 2  | Bielsko-Biała | 3            | 4.80                                                           | 15.42                       | 10.54       | 30.76                           |
| 3  | Bydgoszcz     | 2            | 5.35                                                           | 15.42                       | 10.72       | 31.49                           |
| 4  | Chojnice      | 2            | 6.64                                                           | 15.42                       | 10.77       | 32.83                           |
| 5  | Częstochowa   | 3            | 5.70                                                           | 15.42                       | 10.55       | 31.67                           |
| 6  | Elbląg        | 2            | 6.23                                                           | 15.42                       | 10.72       | 32.37                           |
| 7  | Gdańsk        | 1            | 4.43                                                           | 15.42                       | 10.62       | 30.47                           |
| 8  | Gorzów Wielk. | 2            | 5.11                                                           | 15.42                       | 10.65       | 31.19                           |
| 9  | Hel           | 1            | 4.89                                                           | 15.42                       | 10.65       | 30.96                           |
| 10 | Jelenia Góra  | 3            | 6.80                                                           | 15.42                       | 10.79       | 33.01                           |
| 11 | Kalisz        | 2            | 5.70                                                           | 15.42                       | 10.64       | 31.77                           |
| 12 | Katowice      | 3            | 5.75                                                           | 15.42                       | 10.54       | 31.72                           |
| 13 | Kętrzyn       | 4            | 7.57                                                           | 15.42                       | 10.65       | 33.64                           |
| 14 | Kielce        | 3            | 6.05                                                           | 15.42                       | 10.63       | 32.10                           |
| 15 | Kłodzko       | 3            | 5.34                                                           | 15.42                       | 10.59       | 31.35                           |
| 16 | Koło          | 2            | 4.67                                                           | 15.42                       | 10.57       | 30.66                           |
| 17 | Kołobrzeg     | 1            | 4.20                                                           | 15.42                       | 10.79       | 30.41                           |
| 18 | Koszalin      | 1            | 5.37                                                           | 15.42                       | 10.49       | 31.28                           |
| 19 | Kraków        | 3            | 5.60                                                           | 15.42                       | 10.55       | 31.57                           |
| 20 | Krosno        | 3            | 5.70                                                           | 15.42                       | 10.61       | 31.73                           |
| 21 | Legnica       | 2            | 4.33                                                           | 15.42                       | 10.55       | 30.30                           |
| 22 | Lesko         | 4            | 4.45                                                           | 15.42                       | 10.51       | 30.38                           |
| 23 | Leszno        | 2            | 5.84                                                           | 15.42                       | 10.73       | 31.98                           |
| 24 | Lębork        | 1            | 5.25                                                           | 15.42                       | 10.68       | 31.35                           |
| 25 | Lublin        | 3            | 6.63                                                           | 15.42                       | 10.61       | 32.66                           |
| 26 | Łeba          | 1            | 5.87                                                           | 15.42                       | 10.67       | 31.96                           |
| 27 | Łódź          | 3            | 5.18                                                           | 15.42                       | 10.65       | 31.26                           |
| 28 | Mikołajki     | 4            | 6.81                                                           | 15.42                       | 10.74       | 32.97                           |
| 29 | Mława         | 3            | 6.54                                                           | 15.42                       | 10.69       | 32.65                           |
| 30 | Nowy Sącz     | 3            | 4.06                                                           | 15.42                       | 10.66       | 30.14                           |
| 31 | Olsztyn       | 4            | 7.08                                                           | 15.42                       | 10.79       | 33.29                           |
| 32 | Opole         | 3            | 4.46                                                           | 15.42                       | 10.52       | 30.40                           |
| 33 | Ostrołęka     | 3            | 6.29                                                           | 15.42                       | 10.72       | 32.43                           |
| 34 | Piła          | 2            | 5.64                                                           | 15.42                       | 10.57       | 31.63                           |
| 35 | Płock         | 3            | 5.87                                                           | 15.42                       | 10.58       | 31.88                           |
| 36 | Poznań        | 2            | 5.49                                                           | 15.42                       | 10.65       | 31.56                           |
| 37 | Przemyśl      | 3            | 6.37                                                           | 15.42                       | 10.58       | 32.38                           |
| 38 | Racibórz      | 3            | 4.42                                                           | 15.42                       | 10.51       | 30.36                           |
| 39 | Resko         | 1            | 5.02                                                           | 15.42                       | 10.54       | 30.98                           |
| 40 | Rzeszów       | 3            | 5.86                                                           | 15.42                       | 10.65       | 31.94                           |
| 41 | Sandomierz    | 3            | 5.03                                                           | 15.42                       | 10.59       | 31.04                           |
| 42 | Siedlce       | 4            | 6.59                                                           | 15.42                       | 10.69       | 32.70                           |
| 43 | Słubice       | 2            | 4.49                                                           | 15.42                       | 10.50       | 30.41                           |

| No | Location     | Climate zone | Annual final energy demand EK<br>[kWh/(m <sup>2</sup> · year)] |                                            |             |                                 |
|----|--------------|--------------|----------------------------------------------------------------|--------------------------------------------|-------------|---------------------------------|
|    |              |              | Heating<br><i>EK<sub>H</sub></i>                               | Hot utility<br>water <i>EK<sub>W</sub></i> | Auxiliaries | Total final energy<br>demand EK |
| 44 | Sulejów      | 2            | 5.48                                                           | 15.42                                      | 10.65       | 31.56                           |
| 45 | Suwałki      | 5            | 8.81                                                           | 15.42                                      | 10.74       | 34.97                           |
| 46 | Szczecin     | 1            | 4.41                                                           | 15.42                                      | 10.67       | 30.50                           |
| 47 | Szczecinek   | 1            | 5.29                                                           | 15.42                                      | 10.71       | 31.42                           |
| 48 | Świnoujście  | 1            | 3.97                                                           | 15.42                                      | 10.53       | 29.92                           |
| 49 | Tarnów       | 3            | 4.55                                                           | 15.42                                      | 10.40       | 30.37                           |
| 50 | Terespol     | 4            | 6.57                                                           | 15.42                                      | 10.59       | 32.58                           |
| 51 | Toruń        | 3            | 5.66                                                           | 15.42                                      | 10.70       | 31.78                           |
| 52 | Ustka        | 1            | 5.00                                                           | 15.42                                      | 10.72       | 31.15                           |
| 53 | Warszawa     | 3            | 5.25                                                           | 15.42                                      | 10.65       | 31.32                           |
| 54 | Wieluń       | 2            | 5.33                                                           | 15.42                                      | 10.52       | 31.28                           |
| 55 | Włodawa      | 3            | 6.96                                                           | 15.42                                      | 10.60       | 32.99                           |
| 56 | Wrocław      | 2            | 5.11                                                           | 15.42                                      | 10.59       | 31.13                           |
| 57 | Zakopane     | 5            | 6.22                                                           | 15.42                                      | 10.78       | 32.42                           |
| 58 | Zamość       | 3            | 6.13                                                           | 15.42                                      | 10.69       | 32.24                           |
| 59 | Zielona Góra | 2            | 5.49                                                           | 15.42                                      | 10.66       | 31.57                           |

**Table S4.** Annual final energy demand EK [kWh/(m<sup>2</sup> · year)] for a A3 energy class building.

| No | Location      | Climate zone | Annual final energy demand EK<br>[kWh/(m <sup>2</sup> · year)] |                                            |             |                                 |
|----|---------------|--------------|----------------------------------------------------------------|--------------------------------------------|-------------|---------------------------------|
|    |               |              | Heating<br><i>EK<sub>H</sub></i>                               | Hot utility<br>water <i>EK<sub>W</sub></i> | Auxiliaries | Total final energy<br>demand EK |
| 1  | Białystok     | 4            | 11.95                                                          | 15.42                                      | 2.98        | 30.35                           |
| 2  | Bielsko-Biała | 3            | 8.34                                                           | 15.42                                      | 2.95        | 26.71                           |
| 3  | Bydgoszcz     | 2            | 9.26                                                           | 15.42                                      | 3.00        | 27.69                           |
| 4  | Chojnice      | 2            | 10.94                                                          | 15.42                                      | 3.03        | 29.40                           |
| 5  | Częstochowa   | 3            | 9.42                                                           | 15.42                                      | 2.87        | 27.71                           |
| 6  | Elbląg        | 2            | 10.37                                                          | 15.42                                      | 2.97        | 28.77                           |
| 7  | Gdańsk        | 1            | 7.88                                                           | 15.42                                      | 2.92        | 26.22                           |
| 8  | Gorzów Wielk. | 2            | 8.75                                                           | 15.42                                      | 2.93        | 27.10                           |
| 9  | Hel           | 1            | 8.52                                                           | 15.42                                      | 2.97        | 26.91                           |
| 10 | Jelenia Góra  | 3            | 9.00                                                           | 15.42                                      | 2.99        | 27.41                           |
| 11 | Kalisz        | 2            | 9.65                                                           | 15.42                                      | 2.94        | 28.01                           |
| 12 | Katowice      | 3            | 9.50                                                           | 15.42                                      | 2.86        | 27.79                           |
| 13 | Kętrzyn       | 4            | 11.82                                                          | 15.42                                      | 2.94        | 30.18                           |
| 14 | Kielce        | 3            | 10.05                                                          | 15.42                                      | 2.93        | 28.40                           |
| 15 | Kłodzko       | 3            | 9.13                                                           | 15.42                                      | 2.91        | 27.46                           |
| 16 | Koło          | 2            | 8.19                                                           | 15.42                                      | 2.86        | 26.48                           |
| 17 | Kołobrzeg     | 1            | 7.79                                                           | 15.42                                      | 2.99        | 26.20                           |
| 18 | Koszalin      | 1            | 9.19                                                           | 15.42                                      | 2.97        | 27.58                           |
| 19 | Kraków        | 3            | 9.38                                                           | 15.42                                      | 2.86        | 27.66                           |

| No | Location     | Climate zone | Annual final energy demand $E_K$<br>[kWh/(m <sup>2</sup> · year)] |                                |             |                                 |
|----|--------------|--------------|-------------------------------------------------------------------|--------------------------------|-------------|---------------------------------|
|    |              |              | Heating<br>$E_{K_H}$                                              | Hot utility water<br>$E_{K_W}$ | Auxiliaries | Total final energy demand $E_K$ |
| 20 | Krosno       | 3            | 9.65                                                              | 15.42                          | 2.84        | 27.91                           |
| 21 | Legnica      | 2            | 7.68                                                              | 15.42                          | 2.89        | 25.99                           |
| 22 | Lesko        | 4            | 7.88                                                              | 15.42                          | 2.88        | 26.18                           |
| 23 | Leszno       | 2            | 9.92                                                              | 15.42                          | 2.97        | 28.30                           |
| 24 | Lębork       | 1            | 9.09                                                              | 15.42                          | 2.96        | 27.47                           |
| 25 | Lublin       | 3            | 10.65                                                             | 15.42                          | 2.87        | 28.94                           |
| 26 | Łeba         | 1            | 9.74                                                              | 15.42                          | 2.96        | 28.13                           |
| 27 | Łódź         | 3            | 9.01                                                              | 15.42                          | 2.93        | 27.37                           |
| 28 | Mikołajki    | 4            | 11.09                                                             | 15.42                          | 3.01        | 29.53                           |
| 29 | Mława        | 3            | 10.68                                                             | 15.42                          | 2.98        | 29.08                           |
| 30 | Nowy Sącz    | 3            | 7.59                                                              | 15.42                          | 2.86        | 25.87                           |
| 31 | Olsztyn      | 4            | 11.62                                                             | 15.42                          | 3.02        | 30.06                           |
| 32 | Opole        | 3            | 7.84                                                              | 15.42                          | 2.83        | 26.09                           |
| 33 | Ostrołęka    | 3            | 10.50                                                             | 15.42                          | 3.00        | 28.93                           |
| 34 | Piła         | 2            | 9.28                                                              | 15.42                          | 2.89        | 27.59                           |
| 35 | Płock        | 3            | 9.61                                                              | 15.42                          | 2.89        | 27.92                           |
| 36 | Poznań       | 2            | 9.42                                                              | 15.42                          | 2.88        | 27.73                           |
| 37 | Przemyśl     | 3            | 10.41                                                             | 15.42                          | 2.84        | 28.67                           |
| 38 | Racibórz     | 3            | 7.85                                                              | 15.42                          | 2.82        | 26.10                           |
| 39 | Resko        | 1            | 8.45                                                              | 15.42                          | 2.92        | 26.79                           |
| 40 | Rzeszów      | 3            | 9.99                                                              | 15.42                          | 2.88        | 28.30                           |
| 41 | Sandomierz   | 3            | 8.75                                                              | 15.42                          | 2.86        | 27.04                           |
| 42 | Siedlce      | 4            | 10.77                                                             | 15.42                          | 2.97        | 29.16                           |
| 43 | Słubice      | 2            | 7.78                                                              | 15.42                          | 2.82        | 26.03                           |
| 44 | Sulejów      | 2            | 9.38                                                              | 15.42                          | 2.95        | 27.75                           |
| 45 | Suwałki      | 5            | 13.57                                                             | 15.42                          | 2.99        | 31.99                           |
| 46 | Szczecin     | 1            | 7.95                                                              | 15.42                          | 2.94        | 26.32                           |
| 47 | Szczecinek   | 1            | 9.11                                                              | 15.42                          | 3.00        | 27.54                           |
| 48 | Świnoujście  | 1            | 7.22                                                              | 15.42                          | 2.88        | 25.52                           |
| 49 | Tarnów       | 3            | 10.69                                                             | 15.42                          | 2.74        | 28.85                           |
| 50 | Terespol     | 4            | 10.54                                                             | 15.42                          | 2.85        | 28.81                           |
| 51 | Toruń        | 3            | 9.61                                                              | 15.42                          | 2.96        | 27.99                           |
| 52 | Ustka        | 1            | 8.76                                                              | 15.42                          | 3.01        | 27.20                           |
| 53 | Warszawa     | 3            | 9.05                                                              | 15.42                          | 2.96        | 27.44                           |
| 54 | Wieluń       | 2            | 8.89                                                              | 15.42                          | 2.91        | 27.22                           |
| 55 | Włodawa      | 3            | 11.03                                                             | 15.42                          | 2.89        | 29.34                           |
| 56 | Wrocław      | 2            | 8.81                                                              | 15.42                          | 2.92        | 27.15                           |
| 57 | Zakopane     | 5            | 10.89                                                             | 15.42                          | 3.05        | 29.35                           |
| 58 | Zamość       | 3            | 10.35                                                             | 15.42                          | 2.97        | 28.75                           |
| 59 | Zielona Góra | 2            | 9.40                                                              | 15.42                          | 2.90        | 27.72                           |

**Table S5.** Annual final energy demand  $E_K$  [kWh/(m<sup>2</sup> · year)] for a B1 energy class building.

| No | Location      | Climate zone | Annual final energy demand $E_K$<br>[kWh/(m <sup>2</sup> · year)] |                                |             |                                    |
|----|---------------|--------------|-------------------------------------------------------------------|--------------------------------|-------------|------------------------------------|
|    |               |              | Heating<br>$E_{K_H}$                                              | Hot utility<br>water $E_{K_W}$ | Auxiliaries | Total final energy<br>demand $E_K$ |
| 1  | Białystok     | 4            | 9.13                                                              | 15.42                          | 14.33       | 38.89                              |
| 2  | Bielsko-Biała | 3            | 6.08                                                              | 15.42                          | 14.22       | 35.73                              |
| 3  | Bydgoszcz     | 2            | 6.78                                                              | 15.42                          | 14.37       | 36.57                              |
| 4  | Chojnice      | 2            | 8.20                                                              | 15.42                          | 14.39       | 38.02                              |
| 5  | Częstochowa   | 3            | 7.05                                                              | 15.42                          | 14.22       | 36.69                              |
| 6  | Elbląg        | 2            | 7.73                                                              | 15.42                          | 14.34       | 37.50                              |
| 7  | Gdańsk        | 1            | 5.70                                                              | 15.42                          | 14.27       | 35.40                              |
| 8  | Gorzów Wielk. | 2            | 6.44                                                              | 15.42                          | 14.28       | 36.14                              |
| 9  | Hel           | 1            | 6.21                                                              | 15.42                          | 14.33       | 35.96                              |
| 10 | Jelenia Góra  | 3            | 6.58                                                              | 15.42                          | 14.35       | 36.35                              |
| 11 | Kalisz        | 2            | 7.14                                                              | 15.42                          | 14.30       | 36.86                              |
| 12 | Katowice      | 3            | 7.12                                                              | 15.42                          | 14.21       | 36.75                              |
| 13 | Kętrzyn       | 4            | 9.11                                                              | 15.42                          | 14.29       | 38.82                              |
| 14 | Kielce        | 3            | 7.50                                                              | 15.42                          | 14.28       | 37.20                              |
| 15 | Kłodzko       | 3            | 6.72                                                              | 15.42                          | 14.25       | 36.39                              |
| 16 | Koło          | 2            | 5.96                                                              | 15.42                          | 14.22       | 35.60                              |
| 17 | Kołobrzeg     | 1            | 5.51                                                              | 15.42                          | 14.35       | 35.29                              |
| 18 | Koszalin      | 1            | 6.76                                                              | 15.42                          | 14.34       | 36.53                              |
| 19 | Kraków        | 3            | 6.98                                                              | 15.42                          | 14.21       | 36.61                              |
| 20 | Krosno        | 3            | 7.13                                                              | 15.42                          | 14.19       | 36.75                              |
| 21 | Legnica       | 2            | 5.56                                                              | 15.42                          | 14.23       | 35.21                              |
| 22 | Lesko         | 4            | 5.70                                                              | 15.42                          | 14.20       | 35.33                              |
| 23 | Leszno        | 2            | 7.32                                                              | 15.42                          | 14.33       | 37.08                              |
| 24 | Lębork        | 1            | 6.65                                                              | 15.42                          | 14.33       | 36.40                              |
| 25 | Lublin        | 3            | 8.09                                                              | 15.42                          | 14.23       | 37.74                              |
| 26 | Łeba          | 1            | 7.28                                                              | 15.42                          | 14.32       | 37.03                              |
| 27 | Łódź          | 3            | 6.58                                                              | 15.42                          | 14.28       | 36.28                              |
| 28 | Mikołajki     | 4            | 8.36                                                              | 15.42                          | 14.37       | 38.15                              |
| 29 | Mława         | 3            | 8.05                                                              | 15.42                          | 14.32       | 37.79                              |
| 30 | Nowy Sącz     | 3            | 5.36                                                              | 15.42                          | 14.22       | 35.00                              |
| 31 | Olsztyn       | 4            | 8.73                                                              | 15.42                          | 14.38       | 38.53                              |
| 32 | Opole         | 3            | 5.69                                                              | 15.42                          | 14.19       | 35.30                              |
| 33 | Ostrołęka     | 3            | 7.82                                                              | 15.42                          | 14.35       | 37.60                              |
| 34 | Piła          | 2            | 6.97                                                              | 15.42                          | 14.23       | 36.62                              |
| 35 | Płock         | 3            | 7.23                                                              | 15.42                          | 14.24       | 36.90                              |
| 36 | Poznań        | 2            | 6.93                                                              | 15.42                          | 14.24       | 36.59                              |
| 37 | Przemyśl      | 3            | 7.84                                                              | 15.42                          | 14.20       | 37.46                              |
| 38 | Racibórz      | 3            | 5.67                                                              | 15.42                          | 14.18       | 35.27                              |
| 39 | Resko         | 1            | 6.27                                                              | 15.42                          | 14.27       | 35.96                              |
| 40 | Rzeszów       | 3            | 7.37                                                              | 15.42                          | 14.24       | 37.03                              |
| 41 | Sandomierz    | 3            | 6.39                                                              | 15.42                          | 14.22       | 36.03                              |
| 42 | Siedlce       | 4            | 8.11                                                              | 15.42                          | 14.31       | 37.85                              |
| 43 | Słubice       | 2            | 5.69                                                              | 15.42                          | 14.16       | 35.27                              |

| No | Location     | Climate zone | Annual final energy demand $E_K$<br>[kWh/(m <sup>2</sup> · year)] |                                |             |                                 |
|----|--------------|--------------|-------------------------------------------------------------------|--------------------------------|-------------|---------------------------------|
|    |              |              | Heating<br>$E_{K_H}$                                              | Hot utility water<br>$E_{K_W}$ | Auxiliaries | Total final energy demand $E_K$ |
| 44 | Sulejów      | 2            | 6.91                                                              | 15.42                          | 14.30       | 36.62                           |
| 45 | Suwałki      | 5            | 10.54                                                             | 15.42                          | 14.36       | 40.32                           |
| 46 | Szczecin     | 1            | 5.71                                                              | 15.42                          | 14.29       | 35.42                           |
| 47 | Szczecinek   | 1            | 6.68                                                              | 15.42                          | 14.36       | 36.46                           |
| 48 | Świnoujście  | 1            | 5.16                                                              | 15.42                          | 14.23       | 34.82                           |
| 49 | Tarnów       | 3            | 5.72                                                              | 15.42                          | 14.07       | 35.21                           |
| 50 | Terespol     | 4            | 8.01                                                              | 15.42                          | 14.21       | 37.64                           |
| 51 | Toruń        | 3            | 7.10                                                              | 15.42                          | 14.33       | 36.86                           |
| 52 | Ustka        | 1            | 6.37                                                              | 15.42                          | 14.37       | 36.16                           |
| 53 | Warszawa     | 3            | 6.63                                                              | 15.42                          | 14.33       | 36.39                           |
| 54 | Wieluń       | 2            | 6.62                                                              | 15.42                          | 14.24       | 36.29                           |
| 55 | Włodawa      | 3            | 8.44                                                              | 15.42                          | 14.24       | 38.10                           |
| 56 | Wrocław      | 2            | 6.46                                                              | 15.42                          | 14.27       | 36.15                           |
| 57 | Zakopane     | 5            | 7.92                                                              | 15.42                          | 14.40       | 37.75                           |
| 58 | Zamość       | 3            | 7.66                                                              | 15.42                          | 14.34       | 37.42                           |
| 59 | Zielona Góra | 2            | 6.92                                                              | 15.42                          | 14.26       | 36.60                           |

**Table S6.** Annual final energy demand  $E_K$  [kWh/(m<sup>2</sup> · year)] for a B2 energy class building.

| No | Location      | Climate zone | Annual final energy demand $E_K$<br>[kWh/(m <sup>2</sup> · year)] |                                |             |                                 |
|----|---------------|--------------|-------------------------------------------------------------------|--------------------------------|-------------|---------------------------------|
|    |               |              | Heating<br>$E_{K_H}$                                              | Hot utility water<br>$E_{K_W}$ | Auxiliaries | Total final energy demand $E_K$ |
| 1  | Białystok     | 4            | 11.16                                                             | 15.42                          | 10.90       | 37.48                           |
| 2  | Bielsko-Biała | 3            | 7.72                                                              | 15.42                          | 10.82       | 33.96                           |
| 3  | Bydgoszcz     | 2            | 8.57                                                              | 15.42                          | 10.93       | 34.92                           |
| 4  | Chojnice      | 2            | 10.18                                                             | 15.42                          | 10.97       | 36.57                           |
| 5  | Częstochowa   | 3            | 8.77                                                              | 15.42                          | 10.82       | 35.01                           |
| 6  | Elbląg        | 2            | 9.63                                                              | 15.42                          | 10.89       | 35.95                           |
| 7  | Gdańsk        | 1            | 7.28                                                              | 15.42                          | 10.85       | 33.55                           |
| 8  | Gorzów Wielk. | 2            | 8.10                                                              | 15.42                          | 10.86       | 34.39                           |
| 9  | Hel           | 1            | 7.89                                                              | 15.42                          | 10.90       | 34.21                           |
| 10 | Jelenia Góra  | 3            | 10.15                                                             | 15.42                          | 10.97       | 36.54                           |
| 11 | Kalisz        | 2            | 8.96                                                              | 15.42                          | 10.85       | 35.23                           |
| 12 | Katowice      | 3            | 8.85                                                              | 15.42                          | 10.81       | 35.08                           |
| 13 | Kętrzyn       | 4            | 11.07                                                             | 15.42                          | 10.85       | 37.33                           |
| 14 | Kielce        | 3            | 9.34                                                              | 15.42                          | 10.86       | 35.62                           |
| 15 | Kłodzko       | 3            | 8.46                                                              | 15.42                          | 10.86       | 34.74                           |
| 16 | Koło          | 2            | 7.58                                                              | 15.42                          | 10.80       | 33.80                           |
| 17 | Kołobrzeg     | 1            | 7.15                                                              | 15.42                          | 10.91       | 33.48                           |
| 18 | Koszalin      | 1            | 8.51                                                              | 15.42                          | 10.89       | 34.82                           |
| 19 | Kraków        | 3            | 8.72                                                              | 15.42                          | 10.80       | 34.94                           |



| No | Location     | Climate zone | Annual final energy demand $E_K$<br>[kWh/(m <sup>2</sup> · year)] |                                |             |                                 |
|----|--------------|--------------|-------------------------------------------------------------------|--------------------------------|-------------|---------------------------------|
|    |              |              | Heating<br>$E_{K_H}$                                              | Hot utility water<br>$E_{K_W}$ | Auxiliaries | Total final energy demand $E_K$ |
| 20 | Krosno       | 3            | 8.94                                                              | 15.42                          | 10.77       | 35.14                           |
| 21 | Legnica      | 2            | 7.10                                                              | 15.42                          | 10.83       | 33.35                           |
| 22 | Lesko        | 4            | 7.29                                                              | 15.42                          | 10.83       | 33.53                           |
| 23 | Leszno       | 2            | 9.19                                                              | 15.42                          | 10.88       | 35.49                           |
| 24 | Lębork       | 1            | 8.41                                                              | 15.42                          | 10.89       | 34.72                           |
| 25 | Lublin       | 3            | 9.94                                                              | 15.42                          | 10.81       | 36.17                           |
| 26 | Łeba         | 1            | 9.06                                                              | 15.42                          | 10.89       | 35.38                           |
| 27 | Łódź         | 3            | 8.34                                                              | 15.42                          | 10.87       | 34.63                           |
| 28 | Mikołajki    | 4            | 10.33                                                             | 15.42                          | 10.96       | 36.71                           |
| 29 | Mława        | 3            | 9.95                                                              | 15.42                          | 10.90       | 36.28                           |
| 30 | Nowy Sącz    | 3            | 6.97                                                              | 15.42                          | 10.80       | 33.20                           |
| 31 | Olsztyn      | 4            | 10.81                                                             | 15.42                          | 10.94       | 37.17                           |
| 32 | Opole        | 3            | 7.25                                                              | 15.42                          | 10.77       | 33.44                           |
| 33 | Ostrołęka    | 3            | 9.76                                                              | 15.42                          | 10.92       | 36.10                           |
| 34 | Piła         | 2            | 8.65                                                              | 15.42                          | 10.83       | 34.90                           |
| 35 | Płock        | 3            | 8.95                                                              | 15.42                          | 10.84       | 35.21                           |
| 36 | Poznań       | 2            | 8.73                                                              | 15.42                          | 10.82       | 34.97                           |
| 37 | Przemyśl     | 3            | 9.69                                                              | 15.42                          | 10.77       | 35.89                           |
| 38 | Racibórz     | 3            | 7.25                                                              | 15.42                          | 10.76       | 33.43                           |
| 39 | Resko        | 1            | 7.85                                                              | 15.42                          | 10.85       | 34.12                           |
| 40 | Rzeszów      | 3            | 9.26                                                              | 15.42                          | 10.82       | 35.50                           |
| 41 | Sandomierz   | 3            | 8.10                                                              | 15.42                          | 10.80       | 34.33                           |
| 42 | Siedlce      | 4            | 10.03                                                             | 15.42                          | 10.88       | 36.33                           |
| 43 | Słubice      | 2            | 7.21                                                              | 15.42                          | 10.79       | 33.42                           |
| 44 | Sulejów      | 2            | 8.69                                                              | 15.42                          | 10.88       | 34.99                           |
| 45 | Suwałki      | 5            | 12.72                                                             | 15.42                          | 10.91       | 39.05                           |
| 46 | Szczecin     | 1            | 7.33                                                              | 15.42                          | 10.86       | 33.61                           |
| 47 | Szczecinek   | 1            | 8.44                                                              | 15.42                          | 10.94       | 34.80                           |
| 48 | Świnoujście  | 1            | 6.66                                                              | 15.42                          | 10.82       | 32.90                           |
| 49 | Tarnów       | 3            | 7.19                                                              | 15.42                          | 10.72       | 33.33                           |
| 50 | Terespol     | 4            | 9.83                                                              | 15.42                          | 10.79       | 36.05                           |
| 51 | Toruń        | 3            | 8.91                                                              | 15.42                          | 10.87       | 35.20                           |
| 52 | Ustka        | 1            | 8.10                                                              | 15.42                          | 10.95       | 34.47                           |
| 53 | Warszawa     | 3            | 8.38                                                              | 15.42                          | 10.88       | 34.68                           |
| 54 | Wieluń       | 2            | 8.27                                                              | 15.42                          | 10.84       | 34.53                           |
| 55 | Włodawa      | 3            | 10.31                                                             | 15.42                          | 10.83       | 36.57                           |
| 56 | Wrocław      | 2            | 8.17                                                              | 15.42                          | 10.84       | 34.43                           |
| 57 | Zakopane     | 5            | 10.06                                                             | 15.42                          | 10.99       | 36.47                           |
| 58 | Zamość       | 3            | 9.60                                                              | 15.42                          | 10.89       | 35.92                           |
| 59 | Zielona Góra | 2            | 8.71                                                              | 15.42                          | 10.84       | 34.98                           |

**Table S7.** Annual final energy demand  $E_K$  [kWh/(m<sup>2</sup> · year)] for a B3 energy class building.

| No | Location      | Climate zone | Annual final energy demand $E_K$<br>[kWh/(m <sup>2</sup> · year)] |                                |             |                                    |
|----|---------------|--------------|-------------------------------------------------------------------|--------------------------------|-------------|------------------------------------|
|    |               |              | Heating<br>$E_{K_H}$                                              | Hot utility<br>water $E_{K_W}$ | Auxiliaries | Total final energy<br>demand $E_K$ |
| 1  | Białystok     | 4            | 15.83                                                             | 15.42                          | 3.11        | 34.37                              |
| 2  | Bielsko-Biała | 3            | 11.63                                                             | 15.42                          | 3.01        | 30.06                              |
| 3  | Bydgoszcz     | 2            | 12.82                                                             | 15.42                          | 3.17        | 31.40                              |
| 4  | Chojnice      | 2            | 14.76                                                             | 15.42                          | 3.23        | 33.41                              |
| 5  | Częstochowa   | 3            | 12.81                                                             | 15.42                          | 3.01        | 31.25                              |
| 6  | Elbląg        | 2            | 14.08                                                             | 15.42                          | 3.12        | 32.62                              |
| 7  | Gdańsk        | 1            | 11.07                                                             | 15.42                          | 3.09        | 29.58                              |
| 8  | Gorzów Wielk. | 2            | 12.04                                                             | 15.42                          | 3.07        | 30.53                              |
| 9  | Hel           | 1            | 11.90                                                             | 15.42                          | 3.18        | 30.50                              |
| 10 | Jelenia Góra  | 3            | 12.52                                                             | 15.42                          | 3.16        | 31.11                              |
| 11 | Kalisz        | 2            | 13.24                                                             | 15.42                          | 3.06        | 31.72                              |
| 12 | Katowice      | 3            | 12.90                                                             | 15.42                          | 3.01        | 31.34                              |
| 13 | Kętrzyn       | 4            | 15.60                                                             | 15.42                          | 3.04        | 34.06                              |
| 14 | Kielce        | 3            | 13.66                                                             | 15.42                          | 3.07        | 32.15                              |
| 15 | Kłodzko       | 3            | 12.60                                                             | 15.42                          | 3.06        | 31.09                              |
| 16 | Koło          | 2            | 11.44                                                             | 15.42                          | 3.01        | 29.87                              |
| 17 | Kołobrzeg     | 1            | 11.07                                                             | 15.42                          | 3.13        | 29.62                              |
| 18 | Koszalin      | 1            | 12.64                                                             | 15.42                          | 3.10        | 31.16                              |
| 19 | Kraków        | 3            | 11.05                                                             | 15.42                          | 2.97        | 29.44                              |
| 20 | Krosno        | 3            | 13.13                                                             | 15.42                          | 3.03        | 31.58                              |
| 21 | Legnica       | 2            | 10.78                                                             | 15.42                          | 3.05        | 29.25                              |
| 22 | Lesko         | 4            | 11.09                                                             | 15.42                          | 3.06        | 29.57                              |
| 23 | Leszno        | 2            | 13.58                                                             | 15.42                          | 3.10        | 32.09                              |
| 24 | Lębork        | 1            | 12.58                                                             | 15.42                          | 3.13        | 31.13                              |
| 25 | Lublin        | 3            | 14.21                                                             | 15.42                          | 3.04        | 32.67                              |
| 26 | Łeba          | 1            | 13.25                                                             | 15.42                          | 3.14        | 31.81                              |
| 27 | Łódź          | 3            | 12.47                                                             | 15.42                          | 3.07        | 30.96                              |
| 28 | Mikołajki     | 4            | 14.96                                                             | 15.42                          | 3.20        | 33.58                              |
| 29 | Mława         | 3            | 14.37                                                             | 15.42                          | 3.12        | 32.91                              |
| 30 | Nowy Sącz     | 3            | 10.85                                                             | 15.42                          | 3.02        | 29.29                              |
| 31 | Olsztyn       | 4            | 15.58                                                             | 15.42                          | 3.18        | 34.18                              |
| 32 | Opole         | 3            | 10.95                                                             | 15.42                          | 3.00        | 29.37                              |
| 33 | Ostrołęka     | 3            | 14.24                                                             | 15.42                          | 3.14        | 32.80                              |
| 34 | Piła          | 2            | 12.58                                                             | 15.42                          | 3.27        | 31.27                              |
| 35 | Płock         | 3            | 11.27                                                             | 15.42                          | 3.01        | 29.70                              |
| 36 | Poznań        | 2            | 12.89                                                             | 15.42                          | 3.04        | 31.36                              |
| 37 | Przemyśl      | 3            | 14.01                                                             | 15.42                          | 2.99        | 32.42                              |
| 38 | Racibórz      | 3            | 11.02                                                             | 15.42                          | 2.98        | 29.43                              |
| 39 | Resko         | 1            | 11.63                                                             | 15.42                          | 3.10        | 30.15                              |
| 40 | Rzeszów       | 3            | 13.67                                                             | 15.42                          | 3.02        | 32.11                              |
| 41 | Sandomierz    | 3            | 12.14                                                             | 15.42                          | 3.01        | 30.57                              |
| 42 | Siedlce       | 4            | 14.50                                                             | 15.42                          | 3.09        | 33.01                              |
| 43 | Słubice       | 2            | 10.80                                                             | 15.42                          | 3.01        | 29.22                              |

| No | Location     | Climate zone | Annual final energy demand $E_K$<br>[kWh/(m <sup>2</sup> · year)] |                                |             |                                 |
|----|--------------|--------------|-------------------------------------------------------------------|--------------------------------|-------------|---------------------------------|
|    |              |              | Heating<br>$E_{K_H}$                                              | Hot utility water<br>$E_{K_W}$ | Auxiliaries | Total final energy demand $E_K$ |
| 44 | Sulejów      | 2            | 12.90                                                             | 15.42                          | 3.10        | 31.42                           |
| 45 | Suwałki      | 5            | 17.72                                                             | 15.42                          | 3.12        | 36.26                           |
| 46 | Szczecin     | 1            | 11.20                                                             | 15.42                          | 3.07        | 29.69                           |
| 47 | Szczecinek   | 1            | 12.61                                                             | 15.42                          | 3.21        | 31.24                           |
| 48 | Świnoujście  | 1            | 12.20                                                             | 15.42                          | 3.04        | 30.66                           |
| 49 | Tarnów       | 3            | 10.71                                                             | 15.42                          | 2.96        | 29.09                           |
| 50 | Terespol     | 4            | 14.05                                                             | 15.42                          | 3.06        | 32.53                           |
| 51 | Toruń        | 3            | 13.15                                                             | 15.42                          | 3.06        | 31.64                           |
| 52 | Ustka        | 1            | 12.21                                                             | 15.42                          | 3.22        | 30.86                           |
| 53 | Warszawa     | 3            | 12.53                                                             | 15.42                          | 3.10        | 31.05                           |
| 54 | Wieluń       | 2            | 12.20                                                             | 15.42                          | 3.05        | 30.68                           |
| 55 | Włodawa      | 3            | 14.67                                                             | 15.42                          | 3.05        | 33.15                           |
| 56 | Wrocław      | 2            | 12.22                                                             | 15.42                          | 3.04        | 30.69                           |
| 57 | Zakopane     | 5            | 15.04                                                             | 15.42                          | 3.26        | 33.73                           |
| 58 | Zamość       | 3            | 14.14                                                             | 15.42                          | 3.12        | 32.68                           |
| 59 | Zielona Góra | 2            | 12.86                                                             | 15.42                          | 3.06        | 31.33                           |

**Table S8.** Annual non-renewable primary energy demand  $EP$  [kWh/(m<sup>2</sup> · year)] for a A1 energy class building.

| No | Location      | Climate zone | Annual non-renewable primary energy demand $EP$<br>[kWh/(m <sup>2</sup> · year)] |                             |             |                                  |
|----|---------------|--------------|----------------------------------------------------------------------------------|-----------------------------|-------------|----------------------------------|
|    |               |              | Heating<br>$EP_H$                                                                | Hot utility water<br>$EP_W$ | Auxiliaries | Total primary energy demand $EP$ |
| 1  | Białystok     | 4            | 14.23                                                                            | 6.44                        | 34.98       | 55.65                            |
| 2  | Bielsko-Biała | 3            | 8.57                                                                             | 2.30                        | 34.67       | 45.54                            |
| 3  | Bydgoszcz     | 2            | 9.50                                                                             | 7.92                        | 35.12       | 52.54                            |
| 4  | Chojnice      | 2            | 12.30                                                                            | 9.78                        | 35.23       | 57.31                            |
| 5  | Częstochowa   | 3            | 10.49                                                                            | 2.98                        | 34.79       | 48.26                            |
| 6  | Elbląg        | 2            | 11.43                                                                            | 6.43                        | 35.11       | 52.97                            |
| 7  | Gdańsk        | 1            | 7.69                                                                             | 6.86                        | 34.96       | 49.51                            |
| 8  | Gorzów Wielk. | 2            | 9.20                                                                             | 9.01                        | 34.99       | 53.20                            |
| 9  | Hel           | 1            | 8.64                                                                             | 5.38                        | 34.99       | 49.01                            |
| 10 | Jelenia Góra  | 3            | 9.34                                                                             | 5.71                        | 34.86       | 49.91                            |
| 11 | Kalisz        | 2            | 10.28                                                                            | 5.50                        | 35.00       | 50.79                            |
| 12 | Katowice      | 3            | 10.51                                                                            | 2.15                        | 34.83       | 47.49                            |
| 13 | Kętrzyn       | 4            | 14.48                                                                            | 6.56                        | 35.05       | 56.09                            |
| 14 | Kielce        | 3            | 11.01                                                                            | 3.54                        | 35.02       | 49.56                            |
| 15 | Kłodzko       | 3            | 9.63                                                                             | 3.00                        | 34.82       | 47.46                            |
| 16 | Koło          | 2            | 8.17                                                                             | 2.64                        | 34.85       | 45.66                            |
| 17 | Kołobrzeg     | 1            | 7.19                                                                             | 8.99                        | 34.96       | 51.13                            |
| 18 | Koszalin      | 1            | 9.70                                                                             | 9.02                        | 35.00       | 53.72                            |

| No | Location     | Climate zone | Annual non-renewable primary energy demand $EP$<br>[kWh/(m <sup>2</sup> · year)] |                             |             |                                     |
|----|--------------|--------------|----------------------------------------------------------------------------------|-----------------------------|-------------|-------------------------------------|
|    |              |              | Heating<br>$EP_H$                                                                | Hot utility<br>water $EP_W$ | Auxiliaries | Total primary<br>energy demand $EP$ |
| 19 | Kraków       | 3            | 10.12                                                                            | 1.14                        | 34.86       | 46.12                               |
| 20 | Krosno       | 3            | 10.34                                                                            | 1.60                        | 34.90       | 46.85                               |
| 21 | Legnica      | 2            | 7.56                                                                             | 5.66                        | 34.80       | 48.02                               |
| 22 | Lesko        | 4            | 7.76                                                                             | 2.13                        | 34.66       | 44.54                               |
| 23 | Leszno       | 2            | 10.51                                                                            | 7.13                        | 35.10       | 52.74                               |
| 24 | Lębork       | 1            | 9.31                                                                             | 7.25                        | 35.07       | 51.63                               |
| 25 | Lublin       | 3            | 12.39                                                                            | 3.74                        | 34.98       | 51.11                               |
| 26 | Łeba         | 1            | 10.78                                                                            | 8.39                        | 35.02       | 54.19                               |
| 27 | Łódź         | 3            | 9.19                                                                             | 3.36                        | 35.03       | 47.59                               |
| 28 | Mikołajki    | 4            | 12.76                                                                            | 8.05                        | 35.07       | 55.87                               |
| 29 | Mława        | 3            | 12.11                                                                            | 7.70                        | 35.18       | 54.99                               |
| 30 | Nowy Sącz    | 3            | 6.73                                                                             | 0.44                        | 34.92       | 42.09                               |
| 31 | Olsztyn      | 4            | 13.14                                                                            | 6.75                        | 35.37       | 55.26                               |
| 32 | Opole        | 3            | 7.85                                                                             | 2.22                        | 34.68       | 44.76                               |
| 33 | Ostrołęka    | 3            | 11.37                                                                            | 5.62                        | 35.33       | 52.33                               |
| 34 | Piła         | 2            | 10.31                                                                            | 6.29                        | 34.90       | 51.51                               |
| 35 | Płock        | 3            | 10.83                                                                            | 6.60                        | 34.90       | 52.33                               |
| 36 | Poznań       | 2            | 9.77                                                                             | 4.00                        | 35.10       | 48.86                               |
| 37 | Przemyśl     | 3            | 11.83                                                                            | 0.07                        | 34.91       | 46.81                               |
| 38 | Racibórz     | 3            | 7.00                                                                             | 0.00                        | 34.65       | 41.65                               |
| 39 | Resko        | 1            | 9.17                                                                             | 8.29                        | 34.69       | 52.15                               |
| 40 | Rzeszów      | 3            | 10.47                                                                            | 0.75                        | 35.05       | 46.27                               |
| 41 | Sandomierz   | 3            | 8.87                                                                             | 0.51                        | 34.90       | 44.28                               |
| 42 | Siedlce      | 4            | 12.20                                                                            | 5.44                        | 35.09       | 52.73                               |
| 43 | Słubice      | 2            | 7.94                                                                             | 6.26                        | 34.71       | 48.91                               |
| 44 | Sulejów      | 2            | 9.79                                                                             | 4.17                        | 35.02       | 48.98                               |
| 45 | Suwałki      | 5            | 17.02                                                                            | 8.58                        | 34.81       | 60.41                               |
| 46 | Szczecin     | 1            | 7.61                                                                             | 7.65                        | 34.98       | 50.24                               |
| 47 | Szczecinek   | 1            | 9.48                                                                             | 8.56                        | 35.05       | 53.10                               |
| 48 | Świnoujście  | 1            | 6.81                                                                             | 3.18                        | 34.70       | 44.69                               |
| 49 | Tarnów       | 3            | 8.16                                                                             | 0.00                        | 34.46       | 42.62                               |
| 50 | Terespol     | 4            | 12.34                                                                            | 4.01                        | 34.95       | 51.30                               |
| 51 | Toruń        | 3            | 10.22                                                                            | 7.63                        | 35.11       | 52.97                               |
| 52 | Ustka        | 1            | 8.87                                                                             | 7.70                        | 35.04       | 51.61                               |
| 53 | Warszawa     | 3            | 12.41                                                                            | 3.64                        | 34.89       | 50.94                               |
| 54 | Wieluń       | 2            | 9.80                                                                             | 4.40                        | 34.67       | 48.87                               |
| 55 | Włodawa      | 3            | 13.14                                                                            | 4.15                        | 34.98       | 52.26                               |
| 56 | Wrocław      | 2            | 9.08                                                                             | 2.90                        | 34.89       | 46.87                               |
| 57 | Zakopane     | 5            | 10.92                                                                            | 2.34                        | 35.37       | 48.63                               |
| 58 | Zamość       | 3            | 11.12                                                                            | 0.97                        | 35.12       | 47.20                               |
| 59 | Zielona Góra | 2            | 9.74                                                                             | 7.20                        | 35.20       | 52.15                               |

**Table S9.** Annual non-renewable primary energy demand  $EP$  [kWh/(m<sup>2</sup> · year)] for a A2 energy class building.

| No | Location      | Climate zone | Annual non-renewable primary energy demand $EP$<br>[kWh/(m <sup>2</sup> · year)] |                             |             |                                     |
|----|---------------|--------------|----------------------------------------------------------------------------------|-----------------------------|-------------|-------------------------------------|
|    |               |              | Heating<br>$EP_H$                                                                | Hot utility<br>water $EP_W$ | Auxiliaries | Total primary<br>energy demand $EP$ |
| 1  | Białystok     | 4            | 18.82                                                                            | 6.44                        | 26.76       | 52.03                               |
| 2  | Bielsko-Biała | 3            | 11.99                                                                            | 2.30                        | 26.35       | 40.64                               |
| 3  | Bydgoszcz     | 2            | 13.37                                                                            | 7.92                        | 26.80       | 48.09                               |
| 4  | Chojnice      | 2            | 16.60                                                                            | 9.78                        | 26.91       | 53.29                               |
| 5  | Częstochowa   | 3            | 14.24                                                                            | 2.98                        | 26.37       | 43.59                               |
| 6  | Elbląg        | 2            | 15.57                                                                            | 6.43                        | 26.80       | 48.80                               |
| 7  | Gdańsk        | 1            | 11.09                                                                            | 6.86                        | 26.55       | 44.49                               |
| 8  | Gorzów Wielk. | 2            | 12.78                                                                            | 9.01                        | 26.63       | 48.42                               |
| 9  | Hel           | 1            | 12.21                                                                            | 5.38                        | 26.62       | 44.21                               |
| 10 | Jelenia Góra  | 3            | 17.00                                                                            | 5.71                        | 26.96       | 49.68                               |
| 11 | Kalisz        | 2            | 14.25                                                                            | 5.50                        | 26.61       | 46.37                               |
| 12 | Katowice      | 3            | 14.38                                                                            | 2.15                        | 26.35       | 42.88                               |
| 13 | Kętrzyn       | 4            | 18.93                                                                            | 6.56                        | 26.62       | 52.11                               |
| 14 | Kielce        | 3            | 15.12                                                                            | 3.54                        | 26.58       | 45.23                               |
| 15 | Kłodzko       | 3            | 13.34                                                                            | 3.00                        | 26.48       | 42.83                               |
| 16 | Koło          | 2            | 11.68                                                                            | 2.64                        | 26.42       | 40.73                               |
| 17 | Kołobrzeg     | 1            | 10.50                                                                            | 8.99                        | 26.97       | 46.45                               |
| 18 | Koszalin      | 1            | 13.42                                                                            | 9.02                        | 26.23       | 48.67                               |
| 19 | Kraków        | 3            | 14.01                                                                            | 1.14                        | 26.37       | 41.52                               |
| 20 | Krosno        | 3            | 14.25                                                                            | 1.60                        | 26.51       | 42.37                               |
| 21 | Legnica       | 2            | 10.84                                                                            | 5.66                        | 26.37       | 42.86                               |
| 22 | Lesko         | 4            | 11.11                                                                            | 2.13                        | 26.28       | 39.52                               |
| 23 | Leszno        | 2            | 14.59                                                                            | 7.13                        | 26.82       | 48.54                               |
| 24 | Lębork        | 1            | 13.12                                                                            | 7.25                        | 26.70       | 47.07                               |
| 25 | Lublin        | 3            | 16.57                                                                            | 3.74                        | 26.52       | 46.83                               |
| 26 | Łeba          | 1            | 14.68                                                                            | 8.39                        | 26.66       | 49.73                               |
| 27 | Łódź          | 3            | 12.95                                                                            | 3.36                        | 26.63       | 42.95                               |
| 28 | Mikołajki     | 4            | 17.02                                                                            | 8.05                        | 26.85       | 51.92                               |
| 29 | Mława         | 3            | 16.35                                                                            | 7.70                        | 26.73       | 50.78                               |
| 30 | Nowy Sącz     | 3            | 10.14                                                                            | 0.44                        | 26.64       | 37.22                               |
| 31 | Olsztyn       | 4            | 17.71                                                                            | 6.75                        | 26.97       | 51.43                               |
| 32 | Opole         | 3            | 11.15                                                                            | 2.22                        | 26.31       | 39.68                               |
| 33 | Ostrołęka     | 3            | 15.72                                                                            | 5.62                        | 26.79       | 48.13                               |
| 34 | Piła          | 2            | 14.10                                                                            | 6.29                        | 26.42       | 46.81                               |
| 35 | Płock         | 3            | 14.68                                                                            | 6.60                        | 26.46       | 47.74                               |
| 36 | Poznań        | 2            | 13.74                                                                            | 4.00                        | 26.62       | 44.35                               |
| 37 | Przemyśl      | 3            | 15.93                                                                            | 0.07                        | 26.46       | 42.46                               |
| 38 | Racibórz      | 3            | 10.33                                                                            | 0.00                        | 26.28       | 36.61                               |
| 39 | Resko         | 1            | 12.55                                                                            | 8.29                        | 26.34       | 47.18                               |
| 40 | Rzeszów       | 3            | 14.65                                                                            | 0.75                        | 26.64       | 42.03                               |
| 41 | Sandomierz    | 3            | 12.57                                                                            | 0.51                        | 26.47       | 39.55                               |

| No | Location     | Climate zone | Annual non-renewable primary energy demand $EP$<br>[kWh/(m <sup>2</sup> · year)] |                             |             |                                     |
|----|--------------|--------------|----------------------------------------------------------------------------------|-----------------------------|-------------|-------------------------------------|
|    |              |              | Heating<br>$EP_H$                                                                | Hot utility<br>water $EP_W$ | Auxiliaries | Total primary<br>energy demand $EP$ |
| 42 | Siedlce      | 4            | 16.48                                                                            | 5.44                        | 26.72       | 48.64                               |
| 43 | Słubice      | 2            | 11.23                                                                            | 6.26                        | 26.25       | 43.74                               |
| 44 | Sulejów      | 2            | 13.70                                                                            | 4.17                        | 26.64       | 44.51                               |
| 45 | Suwałki      | 5            | 22.03                                                                            | 8.58                        | 26.84       | 57.45                               |
| 46 | Szczecin     | 1            | 11.03                                                                            | 7.65                        | 26.67       | 45.35                               |
| 47 | Szczecinek   | 1            | 13.24                                                                            | 8.56                        | 26.77       | 48.57                               |
| 48 | Świnoujście  | 1            | 9.93                                                                             | 3.18                        | 26.33       | 39.44                               |
| 49 | Tarnów       | 3            | 11.37                                                                            | 0.00                        | 25.99       | 37.36                               |
| 50 | Terespol     | 4            | 16.42                                                                            | 4.01                        | 26.48       | 46.91                               |
| 51 | Toruń        | 3            | 14.15                                                                            | 7.63                        | 26.76       | 48.54                               |
| 52 | Ustka        | 1            | 12.51                                                                            | 7.70                        | 26.81       | 47.02                               |
| 53 | Warszawa     | 3            | 13.12                                                                            | 3.64                        | 26.63       | 43.39                               |
| 54 | Wieluń       | 2            | 13.33                                                                            | 4.40                        | 26.31       | 44.04                               |
| 55 | Włodawa      | 3            | 17.40                                                                            | 4.15                        | 26.51       | 48.06                               |
| 56 | Wrocław      | 2            | 12.78                                                                            | 2.90                        | 26.48       | 42.16                               |
| 57 | Zakopane     | 5            | 15.55                                                                            | 2.34                        | 26.94       | 44.83                               |
| 58 | Zamość       | 3            | 15.33                                                                            | 0.97                        | 26.72       | 43.01                               |
| 59 | Zielona Góra | 2            | 13.72                                                                            | 7.20                        | 26.65       | 47.57                               |

**Table S10.** Annual non-renewable primary energy demand  $EP$  [kWh/(m<sup>2</sup> · year)] for a A3 energy class building.

| No | Location      | Climate zone | Annual non-renewable primary energy demand $EP$<br>[kWh/(m <sup>2</sup> · year)] |                             |             |                                     |
|----|---------------|--------------|----------------------------------------------------------------------------------|-----------------------------|-------------|-------------------------------------|
|    |               |              | Heating<br>$EP_H$                                                                | Hot utility<br>water $EP_W$ | Auxiliaries | Total primary<br>energy demand $EP$ |
| 1  | Białystok     | 4            | 29.87                                                                            | 6.44                        | 7.45        | 43.76                               |
| 2  | Bielsko-Biała | 3            | 20.84                                                                            | 2.30                        | 7.36        | 30.51                               |
| 3  | Bydgoszcz     | 2            | 23.15                                                                            | 7.92                        | 7.51        | 38.58                               |
| 4  | Chojnice      | 2            | 27.35                                                                            | 9.78                        | 7.58        | 44.72                               |
| 5  | Częstochowa   | 3            | 23.54                                                                            | 2.98                        | 7.17        | 33.69                               |
| 6  | Elbląg        | 2            | 25.92                                                                            | 6.43                        | 7.44        | 39.79                               |
| 7  | Gdańsk        | 1            | 19.70                                                                            | 6.86                        | 7.30        | 33.85                               |
| 8  | Gorzów Wielk. | 2            | 21.87                                                                            | 9.01                        | 7.33        | 38.21                               |
| 9  | Hel           | 1            | 21.30                                                                            | 5.38                        | 7.42        | 34.10                               |
| 10 | Jelenia Góra  | 3            | 22.51                                                                            | 5.71                        | 7.46        | 35.68                               |
| 11 | Kalisz        | 2            | 24.11                                                                            | 5.50                        | 7.36        | 36.97                               |
| 12 | Katowice      | 3            | 23.75                                                                            | 2.15                        | 7.16        | 33.06                               |
| 13 | Kętrzyn       | 4            | 29.54                                                                            | 6.56                        | 7.34        | 43.45                               |
| 14 | Kielce        | 3            | 25.12                                                                            | 3.54                        | 7.32        | 35.98                               |
| 15 | Kłodzko       | 3            | 22.83                                                                            | 3.00                        | 7.28        | 33.11                               |
| 16 | Koło          | 2            | 20.48                                                                            | 2.64                        | 7.16        | 30.27                               |
| 17 | Kołobrzeg     | 1            | 19.47                                                                            | 8.99                        | 7.47        | 35.93                               |

| No | Location     | Climate zone | Annual non-renewable primary energy demand $EP$<br>[kWh/(m <sup>2</sup> · year)] |                             |             |                                     |
|----|--------------|--------------|----------------------------------------------------------------------------------|-----------------------------|-------------|-------------------------------------|
|    |              |              | Heating<br>$EP_H$                                                                | Hot utility<br>water $EP_W$ | Auxiliaries | Total primary<br>energy demand $EP$ |
| 18 | Koszalin     | 1            | 22.96                                                                            | 9.02                        | 7.43        | 39.41                               |
| 19 | Kraków       | 3            | 23.45                                                                            | 1.14                        | 7.14        | 31.73                               |
| 20 | Krosno       | 3            | 24.12                                                                            | 1.60                        | 7.09        | 32.82                               |
| 21 | Legnica      | 2            | 19.19                                                                            | 5.66                        | 7.22        | 32.07                               |
| 22 | Lesko        | 4            | 19.70                                                                            | 2.13                        | 7.20        | 29.03                               |
| 23 | Leszno       | 2            | 24.79                                                                            | 7.13                        | 7.42        | 39.34                               |
| 24 | Lębork       | 1            | 22.72                                                                            | 7.25                        | 7.41        | 37.38                               |
| 25 | Lublin       | 3            | 26.62                                                                            | 3.74                        | 7.17        | 37.54                               |
| 26 | Łeba         | 1            | 24.36                                                                            | 8.39                        | 7.41        | 40.16                               |
| 27 | Łódź         | 3            | 22.54                                                                            | 3.36                        | 7.34        | 33.23                               |
| 28 | Mikołajki    | 4            | 27.73                                                                            | 8.05                        | 7.54        | 43.31                               |
| 29 | Mława        | 3            | 26.71                                                                            | 7.70                        | 7.44        | 41.85                               |
| 30 | Nowy Sącz    | 3            | 18.97                                                                            | 0.44                        | 7.16        | 26.56                               |
| 31 | Olsztyn      | 4            | 29.05                                                                            | 6.75                        | 7.54        | 43.34                               |
| 32 | Opole        | 3            | 19.59                                                                            | 2.22                        | 7.07        | 28.88                               |
| 33 | Ostrołęka    | 3            | 26.26                                                                            | 5.62                        | 7.51        | 39.39                               |
| 34 | Piła         | 2            | 23.20                                                                            | 6.29                        | 7.22        | 36.71                               |
| 35 | Płock        | 3            | 24.02                                                                            | 6.60                        | 7.23        | 37.84                               |
| 36 | Poznań       | 2            | 23.55                                                                            | 4.00                        | 7.21        | 34.76                               |
| 37 | Przemyśl     | 3            | 26.02                                                                            | 0.07                        | 7.10        | 33.19                               |
| 38 | Racibórz     | 3            | 18.91                                                                            | 0.00                        | 7.06        | 25.96                               |
| 39 | Resko        | 1            | 21.12                                                                            | 8.29                        | 7.31        | 36.71                               |
| 40 | Rzeszów      | 3            | 24.98                                                                            | 0.75                        | 7.21        | 32.94                               |
| 41 | Sandomierz   | 3            | 21.89                                                                            | 0.51                        | 7.16        | 29.56                               |
| 42 | Siedlce      | 4            | 26.93                                                                            | 5.44                        | 7.41        | 39.78                               |
| 43 | Słubice      | 2            | 19.45                                                                            | 6.26                        | 7.06        | 32.77                               |
| 44 | Sulejów      | 2            | 23.44                                                                            | 4.17                        | 7.37        | 34.98                               |
| 45 | Suwałki      | 5            | 33.94                                                                            | 8.58                        | 7.48        | 49.99                               |
| 46 | Szczecin     | 1            | 19.88                                                                            | 7.65                        | 7.36        | 34.89                               |
| 47 | Szczecinek   | 1            | 22.79                                                                            | 8.56                        | 7.50        | 38.85                               |
| 48 | Świnoujście  | 1            | 18.05                                                                            | 3.18                        | 7.19        | 28.42                               |
| 49 | Tarnów       | 3            | 26.71                                                                            | 0.00                        | 6.85        | 33.56                               |
| 50 | Terespol     | 4            | 26.35                                                                            | 4.01                        | 7.12        | 37.49                               |
| 51 | Toruń        | 3            | 24.03                                                                            | 7.63                        | 7.40        | 39.05                               |
| 52 | Ustka        | 1            | 21.91                                                                            | 7.70                        | 7.53        | 37.14                               |
| 53 | Warszawa     | 3            | 22.63                                                                            | 3.64                        | 7.41        | 33.67                               |
| 54 | Wieluń       | 2            | 22.23                                                                            | 4.40                        | 7.27        | 33.90                               |
| 55 | Włodawa      | 3            | 27.58                                                                            | 4.15                        | 7.22        | 38.95                               |
| 56 | Wrocław      | 2            | 22.03                                                                            | 2.90                        | 7.29        | 32.23                               |
| 57 | Zakopane     | 5            | 27.21                                                                            | 2.34                        | 7.62        | 37.17                               |
| 58 | Zamość       | 3            | 25.88                                                                            | 0.97                        | 7.43        | 34.28                               |
| 59 | Zielona Góra | 2            | 23.50                                                                            | 7.20                        | 7.25        | 37.95                               |

**Table S11.** Annual non-renewable primary energy demand  $EP$  [kWh/(m<sup>2</sup> · year)] for a B1 energy class building.

| No | Location      | Climate zone | Annual non-renewable primary energy demand $EP$<br>[kWh/(m <sup>2</sup> · year)] |                             |             |                                     |
|----|---------------|--------------|----------------------------------------------------------------------------------|-----------------------------|-------------|-------------------------------------|
|    |               |              | Heating<br>$EP_H$                                                                | Hot utility<br>water $EP_W$ | Auxiliaries | Total primary<br>energy demand $EP$ |
| 1  | Białystok     | 4            | 22.84                                                                            | 6.44                        | 35.83       | 65.10                               |
| 2  | Bielsko-Biała | 3            | 15.21                                                                            | 2.30                        | 35.56       | 53.07                               |
| 3  | Bydgoszcz     | 2            | 16.94                                                                            | 7.92                        | 35.92       | 60.79                               |
| 4  | Chojnice      | 2            | 20.51                                                                            | 9.78                        | 35.98       | 66.27                               |
| 5  | Częstochowa   | 3            | 17.63                                                                            | 2.98                        | 35.55       | 56.16                               |
| 6  | Elbląg        | 2            | 19.33                                                                            | 6.43                        | 35.85       | 61.62                               |
| 7  | Gdańsk        | 1            | 14.25                                                                            | 6.86                        | 35.68       | 56.79                               |
| 8  | Gorzów Wielk. | 2            | 16.10                                                                            | 9.01                        | 35.70       | 60.81                               |
| 9  | Hel           | 1            | 15.54                                                                            | 5.38                        | 35.82       | 56.73                               |
| 10 | Jelenia Góra  | 3            | 16.45                                                                            | 5.71                        | 35.87       | 58.03                               |
| 11 | Kalisz        | 2            | 17.85                                                                            | 5.50                        | 35.76       | 59.11                               |
| 12 | Katowice      | 3            | 17.80                                                                            | 2.15                        | 35.52       | 55.47                               |
| 13 | Kętrzyn       | 4            | 22.78                                                                            | 6.56                        | 35.72       | 65.06                               |
| 14 | Kielce        | 3            | 18.76                                                                            | 3.54                        | 35.69       | 57.99                               |
| 15 | Kłodzko       | 3            | 16.79                                                                            | 3.00                        | 35.63       | 55.43                               |
| 16 | Koło          | 2            | 14.90                                                                            | 2.64                        | 35.55       | 53.08                               |
| 17 | Kołobrzeg     | 1            | 13.79                                                                            | 8.99                        | 35.89       | 58.66                               |
| 18 | Koszalin      | 1            | 16.91                                                                            | 9.02                        | 35.85       | 61.78                               |
| 19 | Kraków        | 3            | 17.46                                                                            | 1.14                        | 35.52       | 54.12                               |
| 20 | Krosno        | 3            | 17.83                                                                            | 1.60                        | 35.48       | 54.92                               |
| 21 | Legnica       | 2            | 13.90                                                                            | 5.66                        | 35.58       | 55.13                               |
| 22 | Lesko         | 4            | 14.25                                                                            | 2.13                        | 35.51       | 51.89                               |
| 23 | Leszno        | 2            | 18.31                                                                            | 7.13                        | 35.84       | 61.28                               |
| 24 | Lębork        | 1            | 16.63                                                                            | 7.25                        | 35.82       | 59.70                               |
| 25 | Lublin        | 3            | 20.23                                                                            | 3.74                        | 35.56       | 59.54                               |
| 26 | Łeba          | 1            | 18.21                                                                            | 8.39                        | 35.81       | 62.41                               |
| 27 | Łódź          | 3            | 16.45                                                                            | 3.36                        | 35.70       | 55.51                               |
| 28 | Mikołajki     | 4            | 20.91                                                                            | 8.05                        | 35.92       | 64.87                               |
| 29 | Mława         | 3            | 20.13                                                                            | 7.70                        | 35.80       | 63.63                               |
| 30 | Nowy Sącz     | 3            | 13.39                                                                            | 0.44                        | 35.55       | 49.38                               |
| 31 | Olsztyn       | 4            | 21.83                                                                            | 6.75                        | 35.95       | 64.53                               |
| 32 | Opole         | 3            | 14.22                                                                            | 2.22                        | 35.47       | 51.91                               |
| 33 | Ostrołęka     | 3            | 19.56                                                                            | 5.62                        | 35.87       | 61.06                               |
| 34 | Piła          | 2            | 17.43                                                                            | 6.29                        | 35.57       | 59.28                               |
| 35 | Płock         | 3            | 18.08                                                                            | 6.60                        | 35.61       | 60.29                               |
| 36 | Poznań        | 2            | 17.33                                                                            | 4.00                        | 35.60       | 56.92                               |
| 37 | Przemysł      | 3            | 19.60                                                                            | 0.07                        | 35.50       | 55.17                               |
| 38 | Racibórz      | 3            | 13.46                                                                            | 0.00                        | 35.45       | 48.91                               |
| 39 | Resko         | 1            | 15.67                                                                            | 8.29                        | 35.69       | 59.64                               |
| 40 | Rzeszów       | 3            | 18.42                                                                            | 0.75                        | 35.60       | 54.78                               |
| 41 | Sandomierz    | 3            | 15.98                                                                            | 0.51                        | 35.55       | 52.04                               |



| No | Location     | Climate zone | Annual non-renewable primary energy demand $EP$<br>[kWh/(m <sup>2</sup> · year)] |                             |             |                                     |
|----|--------------|--------------|----------------------------------------------------------------------------------|-----------------------------|-------------|-------------------------------------|
|    |              |              | Heating<br>$EP_H$                                                                | Hot utility<br>water $EP_W$ | Auxiliaries | Total primary<br>energy demand $EP$ |
| 42 | Siedlce      | 4            | 20.28                                                                            | 5.44                        | 35.78       | 61.50                               |
| 43 | Słubice      | 2            | 14.23                                                                            | 6.26                        | 35.40       | 55.89                               |
| 44 | Sulejów      | 2            | 17.26                                                                            | 4.17                        | 35.74       | 57.17                               |
| 45 | Suwałki      | 5            | 26.35                                                                            | 8.58                        | 35.90       | 70.83                               |
| 46 | Szczecin     | 1            | 14.28                                                                            | 7.65                        | 35.72       | 57.65                               |
| 47 | Szczecinek   | 1            | 16.71                                                                            | 8.56                        | 35.89       | 61.17                               |
| 48 | Świnoujście  | 1            | 12.91                                                                            | 3.18                        | 35.58       | 51.67                               |
| 49 | Tarnów       | 3            | 14.28                                                                            | 0.00                        | 35.17       | 49.45                               |
| 50 | Terespol     | 4            | 20.02                                                                            | 4.01                        | 35.51       | 59.55                               |
| 51 | Toruń        | 3            | 17.76                                                                            | 7.63                        | 35.83       | 61.22                               |
| 52 | Ustka        | 1            | 15.94                                                                            | 7.70                        | 35.92       | 59.56                               |
| 53 | Warszawa     | 3            | 16.58                                                                            | 3.64                        | 35.83       | 56.04                               |
| 54 | Wieluń       | 2            | 16.55                                                                            | 4.40                        | 35.61       | 56.56                               |
| 55 | Włodawa      | 3            | 21.09                                                                            | 4.15                        | 35.60       | 60.85                               |
| 56 | Wrocław      | 2            | 16.16                                                                            | 2.90                        | 35.66       | 54.72                               |
| 57 | Zakopane     | 5            | 19.80                                                                            | 2.34                        | 36.01       | 58.15                               |
| 58 | Zamość       | 3            | 19.16                                                                            | 0.97                        | 35.84       | 55.97                               |
| 59 | Zielona Góra | 2            | 17.31                                                                            | 7.20                        | 35.64       | 60.15                               |

**Table S12.** Annual non-renewable primary energy demand  $EP$  [kWh/(m<sup>2</sup> · year)] for a B2 energy class building.

| No | Location      | Climate zone | Annual non-renewable primary energy demand $EP$<br>[kWh/(m <sup>2</sup> · year)] |                             |             |                                     |
|----|---------------|--------------|----------------------------------------------------------------------------------|-----------------------------|-------------|-------------------------------------|
|    |               |              | Heating<br>$EP_H$                                                                | Hot utility<br>water $EP_W$ | Auxiliaries | Total primary<br>energy demand $EP$ |
| 1  | Białystok     | 4            | 27.91                                                                            | 6.44                        | 27.24       | 61.59                               |
| 2  | Bielsko-Biała | 3            | 19.30                                                                            | 2.30                        | 27.05       | 48.64                               |
| 3  | Bydgoszcz     | 2            | 21.42                                                                            | 7.92                        | 27.33       | 56.66                               |
| 4  | Chojnice      | 2            | 25.44                                                                            | 9.78                        | 27.42       | 62.64                               |
| 5  | Częstochowa   | 3            | 21.92                                                                            | 2.98                        | 27.04       | 51.94                               |
| 6  | Elbląg        | 2            | 24.08                                                                            | 6.43                        | 27.23       | 57.75                               |
| 7  | Gdańsk        | 1            | 18.20                                                                            | 6.86                        | 27.12       | 52.18                               |
| 8  | Gorzów Wielk. | 2            | 20.26                                                                            | 9.01                        | 27.15       | 56.42                               |
| 9  | Hel           | 1            | 19.72                                                                            | 5.38                        | 27.26       | 52.36                               |
| 10 | Jelenia Góra  | 3            | 25.37                                                                            | 5.71                        | 27.43       | 58.51                               |
| 11 | Kalisz        | 2            | 22.39                                                                            | 5.50                        | 27.13       | 55.03                               |
| 12 | Katowice      | 3            | 22.12                                                                            | 2.15                        | 27.02       | 51.29                               |
| 13 | Kętrzyn       | 4            | 27.67                                                                            | 6.56                        | 27.11       | 61.34                               |
| 14 | Kielce        | 3            | 23.36                                                                            | 3.54                        | 27.14       | 54.04                               |
| 15 | Kłodzko       | 3            | 21.16                                                                            | 3.00                        | 27.14       | 51.30                               |
| 16 | Koło          | 2            | 18.95                                                                            | 2.64                        | 27.01       | 48.59                               |

| No | Location     | Climate zone | Annual non-renewable primary energy demand $EP$<br>[kWh/(m <sup>2</sup> · year)] |                             |             |                                     |
|----|--------------|--------------|----------------------------------------------------------------------------------|-----------------------------|-------------|-------------------------------------|
|    |              |              | Heating<br>$EP_H$                                                                | Hot utility<br>water $EP_W$ | Auxiliaries | Total primary<br>energy demand $EP$ |
| 17 | Kołobrzeg    | 1            | 17.88                                                                            | 8.99                        | 27.27       | 54.13                               |
| 18 | Koszalin     | 1            | 21.28                                                                            | 9.02                        | 27.22       | 57.51                               |
| 19 | Kraków       | 3            | 21.80                                                                            | 1.14                        | 26.99       | 49.93                               |
| 20 | Krosno       | 3            | 22.35                                                                            | 1.60                        | 26.93       | 50.89                               |
| 21 | Legnica      | 2            | 17.74                                                                            | 5.66                        | 27.08       | 50.49                               |
| 22 | Lesko        | 4            | 18.21                                                                            | 2.13                        | 27.07       | 47.41                               |
| 23 | Leszno       | 2            | 22.97                                                                            | 7.13                        | 27.20       | 57.31                               |
| 24 | Lębork       | 1            | 21.02                                                                            | 7.25                        | 27.22       | 55.49                               |
| 25 | Lublin       | 3            | 24.85                                                                            | 3.74                        | 27.02       | 55.62                               |
| 26 | Łeba         | 1            | 22.65                                                                            | 8.39                        | 27.23       | 58.28                               |
| 27 | Łódź         | 3            | 20.84                                                                            | 3.36                        | 27.17       | 51.37                               |
| 28 | Mikołajki    | 4            | 25.83                                                                            | 8.05                        | 27.39       | 61.26                               |
| 29 | Mława        | 3            | 24.88                                                                            | 7.70                        | 27.26       | 59.84                               |
| 30 | Nowy Sącz    | 3            | 17.43                                                                            | 0.44                        | 27.01       | 44.87                               |
| 31 | Olsztyn      | 4            | 27.02                                                                            | 6.75                        | 27.35       | 61.13                               |
| 32 | Opole        | 3            | 18.12                                                                            | 2.22                        | 26.92       | 47.26                               |
| 33 | Ostrołęka    | 3            | 24.40                                                                            | 5.62                        | 27.31       | 57.33                               |
| 34 | Piła         | 2            | 21.62                                                                            | 6.29                        | 27.08       | 54.99                               |
| 35 | Płock        | 3            | 22.38                                                                            | 6.60                        | 27.09       | 56.07                               |
| 36 | Poznań       | 2            | 21.81                                                                            | 4.00                        | 27.06       | 52.87                               |
| 37 | Przemyśl     | 3            | 24.23                                                                            | 0.07                        | 26.93       | 51.23                               |
| 38 | Racibórz     | 3            | 17.40                                                                            | 0.00                        | 26.91       | 44.31                               |
| 39 | Resko        | 1            | 19.62                                                                            | 8.29                        | 27.13       | 55.04                               |
| 40 | Rzeszów      | 3            | 23.14                                                                            | 0.75                        | 27.04       | 50.94                               |
| 41 | Sandomierz   | 3            | 20.25                                                                            | 0.51                        | 27.01       | 47.77                               |
| 42 | Siedlce      | 4            | 25.07                                                                            | 5.44                        | 27.20       | 57.71                               |
| 43 | Słubice      | 2            | 18.03                                                                            | 6.26                        | 26.98       | 51.26                               |
| 44 | Sulejów      | 2            | 21.73                                                                            | 4.17                        | 27.19       | 53.09                               |
| 45 | Suwałki      | 5            | 31.81                                                                            | 8.58                        | 27.27       | 67.65                               |
| 46 | Szczecin     | 1            | 18.33                                                                            | 7.65                        | 27.15       | 53.13                               |
| 47 | Szczecinek   | 1            | 21.10                                                                            | 8.56                        | 27.34       | 57.00                               |
| 48 | Świnoujście  | 1            | 16.64                                                                            | 3.18                        | 27.04       | 46.87                               |
| 49 | Tarnów       | 3            | 17.95                                                                            | 0.00                        | 26.81       | 44.76                               |
| 50 | Terespol     | 4            | 24.59                                                                            | 4.01                        | 26.98       | 55.58                               |
| 51 | Toruń        | 3            | 22.28                                                                            | 7.63                        | 27.17       | 57.08                               |
| 52 | Ustka        | 1            | 20.25                                                                            | 7.70                        | 27.37       | 55.32                               |
| 53 | Warszawa     | 3            | 20.95                                                                            | 3.64                        | 27.20       | 51.79                               |
| 54 | Wieluń       | 2            | 20.68                                                                            | 4.40                        | 27.09       | 52.17                               |
| 55 | Włodawa      | 3            | 25.79                                                                            | 4.15                        | 27.09       | 57.02                               |
| 56 | Wrocław      | 2            | 20.42                                                                            | 2.90                        | 27.11       | 50.42                               |
| 57 | Zakopane     | 5            | 25.14                                                                            | 2.34                        | 27.47       | 54.95                               |
| 58 | Zamość       | 3            | 24.01                                                                            | 0.97                        | 27.23       | 52.21                               |
| 59 | Zielona Góra | 2            | 21.78                                                                            | 7.20                        | 27.10       | 56.09                               |

**Table S13.** Annual non-renewable primary energy demand  $EP$  [kWh/(m<sup>2</sup> · year)] for a B3 energy class building.

| No | Location      | Climate zone | Annual non-renewable primary energy demand $EP$<br>[kWh/(m <sup>2</sup> · year)] |                             |             |                                     |
|----|---------------|--------------|----------------------------------------------------------------------------------|-----------------------------|-------------|-------------------------------------|
|    |               |              | Heating<br>$EP_H$                                                                | Hot utility<br>water $EP_W$ | Auxiliaries | Total primary<br>energy demand $EP$ |
| 1  | Białystok     | 4            | 39.58                                                                            | 6.44                        | 7.78        | 53.80                               |
| 2  | Bielsko-Biała | 3            | 29.08                                                                            | 2.30                        | 7.51        | 38.89                               |
| 3  | Bydgoszcz     | 2            | 32.04                                                                            | 7.92                        | 7.92        | 47.88                               |
| 4  | Chojnice      | 2            | 36.91                                                                            | 9.78                        | 8.07        | 54.76                               |
| 5  | Częstochowa   | 3            | 32.03                                                                            | 2.98                        | 7.54        | 42.55                               |
| 6  | Elbląg        | 2            | 35.21                                                                            | 6.43                        | 7.79        | 49.44                               |
| 7  | Gdańsk        | 1            | 27.68                                                                            | 6.86                        | 7.73        | 42.26                               |
| 8  | Gorzów Wielk. | 2            | 30.10                                                                            | 9.01                        | 7.67        | 46.78                               |
| 9  | Hel           | 1            | 29.74                                                                            | 5.38                        | 7.94        | 43.06                               |
| 10 | Jelenia Góra  | 3            | 31.31                                                                            | 5.71                        | 7.91        | 44.93                               |
| 11 | Kalisz        | 2            | 33.09                                                                            | 5.50                        | 7.65        | 46.24                               |
| 12 | Katowice      | 3            | 32.26                                                                            | 2.15                        | 7.52        | 41.93                               |
| 13 | Kętrzyn       | 4            | 39.01                                                                            | 6.56                        | 7.60        | 53.17                               |
| 14 | Kielce        | 3            | 34.15                                                                            | 3.54                        | 7.68        | 45.36                               |
| 15 | Kłodzko       | 3            | 31.51                                                                            | 3.00                        | 7.65        | 42.16                               |
| 16 | Koło          | 2            | 28.59                                                                            | 2.64                        | 7.53        | 38.75                               |
| 17 | Kołobrzeg     | 1            | 27.67                                                                            | 8.99                        | 7.82        | 44.47                               |
| 18 | Koszalin      | 1            | 31.59                                                                            | 9.02                        | 7.76        | 48.37                               |
| 19 | Kraków        | 3            | 27.63                                                                            | 1.14                        | 7.42        | 36.19                               |
| 20 | Krosno        | 3            | 32.83                                                                            | 1.60                        | 7.57        | 42.00                               |
| 21 | Legnica       | 2            | 26.96                                                                            | 5.66                        | 7.63        | 40.24                               |
| 22 | Lesko         | 4            | 27.73                                                                            | 2.13                        | 7.65        | 37.51                               |
| 23 | Leszno        | 2            | 33.94                                                                            | 7.13                        | 7.74        | 48.82                               |
| 24 | Lębork        | 1            | 31.45                                                                            | 7.25                        | 7.81        | 46.52                               |
| 25 | Lublin        | 3            | 35.53                                                                            | 3.74                        | 7.59        | 46.86                               |
| 26 | Łeba          | 1            | 33.12                                                                            | 8.39                        | 7.86        | 49.37                               |
| 27 | Łódź          | 3            | 31.18                                                                            | 3.36                        | 7.68        | 42.21                               |
| 28 | Mikołajki     | 4            | 37.40                                                                            | 8.05                        | 7.99        | 53.44                               |
| 29 | Mława         | 3            | 35.92                                                                            | 7.70                        | 7.81        | 51.43                               |
| 30 | Nowy Sącz     | 3            | 27.12                                                                            | 0.44                        | 7.56        | 35.11                               |
| 31 | Olsztyn       | 4            | 38.96                                                                            | 6.75                        | 7.94        | 53.66                               |
| 32 | Opole         | 3            | 27.37                                                                            | 2.22                        | 7.49        | 37.08                               |
| 33 | Ostrołęka     | 3            | 35.60                                                                            | 5.62                        | 7.85        | 49.07                               |
| 34 | Piła          | 2            | 31.46                                                                            | 6.29                        | 8.17        | 45.92                               |
| 35 | Płock         | 3            | 28.17                                                                            | 6.60                        | 7.52        | 42.28                               |
| 36 | Poznań        | 2            | 32.24                                                                            | 4.00                        | 7.60        | 43.83                               |
| 37 | Przemysł      | 3            | 35.03                                                                            | 0.07                        | 7.47        | 42.57                               |
| 38 | Racibórz      | 3            | 26.84                                                                            | 0.00                        | 7.46        | 34.30                               |
| 39 | Resko         | 1            | 29.08                                                                            | 8.29                        | 7.74        | 45.10                               |

| No | Location     | Climate zone | Annual non-renewable primary energy demand $EP$<br>[kWh/(m <sup>2</sup> · year)] |                             |             |                                     |
|----|--------------|--------------|----------------------------------------------------------------------------------|-----------------------------|-------------|-------------------------------------|
|    |              |              | Heating<br>$EP_H$                                                                | Hot utility<br>water $EP_W$ | Auxiliaries | Total primary<br>energy demand $EP$ |
| 40 | Rzeszów      | 3            | 34.17                                                                            | 0.75                        | 7.55        | 42.47                               |
| 41 | Sandomierz   | 3            | 30.34                                                                            | 0.51                        | 7.54        | 38.39                               |
| 42 | Siedlce      | 4            | 36.25                                                                            | 5.44                        | 7.72        | 49.42                               |
| 43 | Słubice      | 2            | 26.99                                                                            | 6.26                        | 7.52        | 40.76                               |
| 44 | Sulejów      | 2            | 32.26                                                                            | 4.17                        | 7.75        | 44.17                               |
| 45 | Suwałki      | 5            | 44.29                                                                            | 8.58                        | 7.80        | 60.66                               |
| 46 | Szczecin     | 1            | 27.99                                                                            | 7.65                        | 7.67        | 43.31                               |
| 47 | Szczecinek   | 1            | 31.54                                                                            | 8.56                        | 8.02        | 48.12                               |
| 48 | Świnoujście  | 1            | 30.51                                                                            | 3.18                        | 7.60        | 41.29                               |
| 49 | Tarnów       | 3            | 26.74                                                                            | 0.00                        | 7.40        | 34.14                               |
| 50 | Terespol     | 4            | 35.12                                                                            | 4.01                        | 7.65        | 46.79                               |
| 51 | Toruń        | 3            | 32.88                                                                            | 7.63                        | 7.65        | 48.17                               |
| 52 | Ustka        | 1            | 30.52                                                                            | 7.70                        | 8.06        | 46.29                               |
| 53 | Warszawa     | 3            | 31.33                                                                            | 3.64                        | 7.74        | 42.71                               |
| 54 | Wieluń       | 2            | 30.51                                                                            | 4.40                        | 7.63        | 42.54                               |
| 55 | Włodawa      | 3            | 36.68                                                                            | 4.15                        | 7.63        | 48.46                               |
| 56 | Wrocław      | 2            | 30.56                                                                            | 2.90                        | 7.61        | 41.07                               |
| 57 | Zakopane     | 5            | 37.60                                                                            | 2.34                        | 8.16        | 48.10                               |
| 58 | Zamość       | 3            | 35.35                                                                            | 0.97                        | 7.79        | 44.11                               |
| 59 | Zielona Góra | 2            | 32.14                                                                            | 7.20                        | 7.64        | 46.98                               |

**Table S14.** CO<sub>2</sub> emissions rate [kg/(m<sup>2</sup> · year)] the adopted building in six energy classes and 59 locations in Poland.

| No | Location      | Climate zone | CO <sub>2</sub> emissions rate [kg/(m <sup>2</sup> · year)] |          |          |          |          |          |
|----|---------------|--------------|-------------------------------------------------------------|----------|----------|----------|----------|----------|
|    |               |              | Class A1                                                    | Class A2 | Class A3 | Class B1 | Class B2 | Class B3 |
| 1  | Białystok     | 4            | 5.85                                                        | 7.15     | 10.28    | 8.29     | 9.73     | 13.03    |
| 2  | Bielsko-Biała | 3            | 3.08                                                        | 4.05     | 6.56     | 4.96     | 6.12     | 8.89     |
| 3  | Bydgoszcz     | 2            | 4.93                                                        | 6.03     | 8.80     | 7.04     | 8.31     | 11.32    |
| 4  | Chojnice      | 2            | 6.25                                                        | 7.47     | 10.52    | 8.58     | 9.98     | 13.22    |
| 5  | Częstochowa   | 3            | 3.82                                                        | 4.88     | 7.51     | 5.84     | 7.05     | 9.92     |
| 6  | Elbląg        | 2            | 5.06                                                        | 6.23     | 9.16     | 7.30     | 8.64     | 11.79    |
| 7  | Gdańsk        | 1            | 4.12                                                        | 5.08     | 7.52     | 5.98     | 7.10     | 9.78     |
| 8  | Gorzów Wielk. | 2            | 5.16                                                        | 6.17     | 8.75     | 7.11     | 8.29     | 11.08    |
| 9  | Hel           | 1            | 3.97                                                        | 4.98     | 7.56     | 5.92     | 7.11     | 9.95     |
| 10 | Jelenia Góra  | 3            | 4.26                                                        | 6.43     | 7.99     | 6.28     | 8.80     | 10.48    |
| 11 | Kalisz        | 2            | 4.47                                                        | 5.59     | 8.39     | 6.61     | 7.90     | 10.93    |
| 12 | Katowice      | 3            | 3.58                                                        | 4.68     | 7.33     | 5.65     | 6.87     | 9.74     |
| 13 | Kętrzyn       | 4            | 5.96                                                        | 7.22     | 10.22    | 8.31     | 9.69     | 12.90    |
| 14 | Kielce        | 3            | 4.12                                                        | 5.28     | 8.12     | 6.31     | 7.62     | 10.67    |
| 15 | Kłodzko       | 3            | 3.58                                                        | 4.63     | 7.31     | 5.61     | 6.84     | 9.77     |
| 16 | Koło          | 2            | 3.06                                                        | 4.05     | 6.55     | 4.97     | 6.11     | 8.84     |
| 17 | Kołobrzeg     | 1            | 4.58                                                        | 5.52     | 8.06     | 6.45     | 7.61     | 10.38    |

| No | Location     | Climate zone | CO <sub>2</sub> emissions rate [kg/(m <sup>2</sup> · year)] |          |          |          |          |          |
|----|--------------|--------------|-------------------------------------------------------------|----------|----------|----------|----------|----------|
|    |              |              | Class A1                                                    | Class A2 | Class A3 | Class B1 | Class B2 | Class B3 |
| 18 | Koszalin     | 1            | 5.30                                                        | 6.35     | 9.06     | 7.34     | 8.58     | 11.50    |
| 19 | Kraków       | 3            | 3.19                                                        | 4.29     | 6.96     | 5.27     | 6.50     | 8.15     |
| 20 | Krosno       | 3            | 3.38                                                        | 4.49     | 7.29     | 5.51     | 6.78     | 9.75     |
| 21 | Legnica      | 2            | 3.74                                                        | 4.67     | 7.04     | 5.54     | 6.63     | 9.24     |
| 22 | Lesko        | 4            | 2.80                                                        | 3.75     | 6.18     | 4.64     | 5.76     | 8.46     |
| 23 | Leszno       | 2            | 5.00                                                        | 6.15     | 9.04     | 7.21     | 8.53     | 11.63    |
| 24 | Lębork       | 1            | 4.69                                                        | 5.77     | 8.49     | 6.76     | 8.01     | 10.96    |
| 25 | Lublin       | 3            | 4.57                                                        | 5.75     | 8.60     | 6.79     | 8.10     | 11.12    |
| 26 | Łeba         | 1            | 5.43                                                        | 6.53     | 9.28     | 7.53     | 8.79     | 11.76    |
| 27 | Łódź         | 3            | 3.55                                                        | 4.62     | 7.33     | 5.61     | 6.85     | 9.78     |
| 28 | Mikołajki    | 4            | 5.89                                                        | 7.10     | 10.13    | 8.20     | 9.59     | 12.87    |
| 29 | Mława        | 3            | 5.61                                                        | 6.81     | 9.75     | 7.88     | 9.23     | 12.35    |
| 30 | Nowy Sącz    | 3            | 2.03                                                        | 3.00     | 5.50     | 3.92     | 5.06     | 7.80     |
| 31 | Olsztyn      | 4            | 5.63                                                        | 6.93     | 10.14    | 8.10     | 9.57     | 12.95    |
| 32 | Opole        | 3            | 2.85                                                        | 3.79     | 6.18     | 4.66     | 5.76     | 8.38     |
| 33 | Ostrołęka    | 3            | 4.81                                                        | 6.04     | 9.03     | 7.13     | 8.50     | 11.67    |
| 34 | Piła         | 2            | 4.70                                                        | 5.77     | 8.35     | 6.72     | 7.90     | 10.69    |
| 35 | Płock        | 3            | 4.94                                                        | 6.03     | 8.67     | 6.99     | 8.21     | 9.85     |
| 36 | Poznań       | 2            | 3.90                                                        | 5.02     | 7.80     | 6.04     | 7.31     | 10.26    |
| 37 | Przemyśl     | 3            | 3.37                                                        | 4.53     | 7.39     | 5.57     | 6.88     | 9.94     |
| 38 | Racibórz     | 3            | 1.98                                                        | 2.93     | 5.35     | 3.81     | 4.93     | 7.60     |
| 39 | Resko        | 1            | 4.94                                                        | 5.90     | 8.33     | 6.78     | 7.90     | 10.58    |
| 40 | Rzeszów      | 3            | 3.18                                                        | 4.36     | 7.29     | 5.43     | 6.77     | 9.89     |
| 41 | Sandomierz   | 3            | 2.66                                                        | 3.70     | 6.34     | 4.67     | 5.88     | 8.74     |
| 42 | Siedlce      | 4            | 5.00                                                        | 6.21     | 9.17     | 7.28     | 8.64     | 11.81    |
| 43 | Słubice      | 2            | 4.02                                                        | 4.95     | 7.28     | 5.80     | 6.88     | 9.42     |
| 44 | Sulejów      | 2            | 3.95                                                        | 5.06     | 7.82     | 6.07     | 7.33     | 10.31    |
| 45 | Suwałki      | 5            | 7.25                                                        | 8.67     | 12.04    | 9.89     | 11.44    | 14.97    |
| 46 | Szczecin     | 1            | 4.32                                                        | 5.29     | 7.80     | 6.21     | 7.36     | 10.09    |
| 47 | Szczecinek   | 1            | 5.11                                                        | 6.17     | 8.88     | 7.16     | 8.40     | 11.36    |
| 48 | Świnoujście  | 1            | 2.83                                                        | 3.71     | 6.01     | 4.56     | 5.61     | 9.54     |
| 49 | Tarnów       | 3            | 2.31                                                        | 3.22     | 7.56     | 4.04     | 5.08     | 7.57     |
| 50 | Terespol     | 4            | 4.63                                                        | 5.79     | 8.60     | 6.81     | 8.10     | 11.08    |
| 51 | Toruń        | 3            | 5.06                                                        | 6.17     | 8.97     | 7.19     | 8.47     | 11.47    |
| 52 | Ustka        | 1            | 4.69                                                        | 5.72     | 8.39     | 6.69     | 7.92     | 10.83    |
| 53 | Warszawa     | 3            | 4.54                                                        | 4.75     | 7.44     | 5.73     | 6.96     | 9.90     |
| 54 | Wieluń       | 2            | 4.02                                                        | 5.02     | 7.54     | 5.93     | 7.10     | 9.89     |
| 55 | Włodawa      | 3            | 4.90                                                        | 6.10     | 8.98     | 7.15     | 8.48     | 11.56    |
| 56 | Wrocław      | 2            | 3.39                                                        | 4.44     | 7.06     | 5.40     | 6.60     | 9.47     |
| 57 | Zakopane     | 5            | 3.75                                                        | 5.07     | 8.37     | 6.27     | 7.78     | 11.31    |
| 58 | Zamość       | 3            | 3.42                                                        | 4.61     | 7.60     | 5.70     | 7.07     | 10.28    |
| 59 | Zielona Góra | 2            | 4.80                                                        | 5.92     | 8.69     | 6.94     | 8.21     | 11.14    |

**Table S15.** Energy and heat source investment cost [€] for the adopted building in six energy classes and 59 locations in Poland.

| No | Location      | Climate zone | Energy and heat source investment costs [€] |          |          |          |          |          |
|----|---------------|--------------|---------------------------------------------|----------|----------|----------|----------|----------|
|    |               |              | Class A1                                    | Class A2 | Class A3 | Class B1 | Class B2 | Class B3 |
| 1  | Białystok     | 4            | 106 164                                     | 115 264  | 120 343  | 114 638  | 123 738  | 128 817  |
| 2  | Bielsko-Biała | 3            | 104 213                                     | 112 881  | 117 721  | 112 270  | 120 938  | 125 779  |
| 3  | Bydgoszcz     | 2            | 102 277                                     | 110 513  | 115 100  | 109 917  | 118 153  | 122 740  |
| 4  | Chojnice      | 2            | 102 277                                     | 110 513  | 115 100  | 109 917  | 118 153  | 122 740  |
| 5  | Częstochowa   | 3            | 104 213                                     | 112 881  | 117 721  | 112 270  | 120 938  | 125 779  |
| 6  | Elbląg        | 2            | 102 277                                     | 110 513  | 115 100  | 109 917  | 118 153  | 122 740  |
| 7  | Gdańsk        | 1            | 100 326                                     | 108 130  | 112 494  | 107 549  | 115 353  | 119 717  |
| 8  | Gorzów Wielk. | 2            | 102 277                                     | 110 513  | 115 100  | 109 917  | 118 153  | 122 740  |
| 9  | Hel           | 1            | 100 326                                     | 108 130  | 112 494  | 107 549  | 115 353  | 119 717  |
| 10 | Jelenia Góra  | 3            | 104 213                                     | 112 881  | 117 721  | 112 270  | 120 938  | 125 779  |
| 11 | Kalisz        | 2            | 102 277                                     | 110 513  | 115 100  | 109 917  | 118 153  | 122 740  |
| 12 | Katowice      | 3            | 104 213                                     | 112 881  | 117 721  | 112 270  | 120 938  | 125 779  |
| 13 | Kętrzyn       | 4            | 106 164                                     | 115 264  | 120 343  | 114 638  | 123 738  | 128 817  |
| 14 | Kielce        | 3            | 104 213                                     | 112 881  | 117 721  | 112 270  | 120 938  | 125 779  |
| 15 | Kłodzko       | 3            | 104 213                                     | 112 881  | 117 721  | 112 270  | 120 938  | 125 779  |
| 16 | Koło          | 2            | 102 277                                     | 110 513  | 115 100  | 109 917  | 118 153  | 122 740  |
| 17 | Kołobrzeg     | 1            | 100 326                                     | 108 130  | 112 494  | 107 549  | 115 353  | 119 717  |
| 18 | Koszalin      | 1            | 100 326                                     | 108 130  | 112 494  | 107 549  | 115 353  | 119 717  |
| 19 | Kraków        | 3            | 104 213                                     | 112 881  | 117 721  | 112 270  | 120 938  | 125 779  |
| 20 | Krosno        | 3            | 104 213                                     | 112 881  | 117 721  | 112 270  | 120 938  | 125 779  |
| 21 | Legnica       | 2            | 102 277                                     | 110 513  | 115 100  | 109 917  | 118 153  | 122 740  |
| 22 | Lesko         | 4            | 106 164                                     | 115 264  | 120 343  | 114 638  | 123 738  | 128 817  |
| 23 | Leszno        | 2            | 102 277                                     | 110 513  | 115 100  | 109 917  | 118 153  | 122 740  |
| 24 | Lębork        | 1            | 100 326                                     | 108 130  | 112 494  | 107 549  | 115 353  | 119 717  |
| 25 | Lublin        | 3            | 104 213                                     | 112 881  | 117 721  | 112 270  | 120 938  | 125 779  |
| 26 | Łeba          | 1            | 100 326                                     | 108 130  | 112 494  | 107 549  | 115 353  | 119 717  |
| 27 | Łódź          | 3            | 104 213                                     | 112 881  | 117 721  | 112 270  | 120 938  | 125 779  |
| 28 | Mikołajki     | 4            | 106 164                                     | 115 264  | 120 343  | 114 638  | 123 738  | 128 817  |
| 29 | Mława         | 3            | 104 213                                     | 112 881  | 117 721  | 112 270  | 120 938  | 125 779  |
| 30 | Nowy Sącz     | 3            | 104 213                                     | 112 881  | 117 721  | 112 270  | 120 938  | 125 779  |
| 31 | Olsztyn       | 4            | 106 164                                     | 115 264  | 120 343  | 114 638  | 123 738  | 128 817  |
| 32 | Opole         | 3            | 104 213                                     | 112 881  | 117 721  | 112 270  | 120 938  | 125 779  |
| 33 | Ostrołęka     | 3            | 104 213                                     | 112 881  | 117 721  | 112 270  | 120 938  | 125 779  |
| 34 | Piła          | 2            | 102 277                                     | 110 513  | 115 100  | 109 917  | 118 153  | 122 740  |
| 35 | Płock         | 3            | 104 213                                     | 112 881  | 117 721  | 112 270  | 120 938  | 125 779  |
| 36 | Poznań        | 2            | 102 277                                     | 110 513  | 115 100  | 109 917  | 118 153  | 122 740  |
| 37 | Przemyśl      | 3            | 104 213                                     | 112 881  | 117 721  | 112 270  | 120 938  | 125 779  |
| 38 | Racibórz      | 3            | 104 213                                     | 112 881  | 117 721  | 112 270  | 120 938  | 125 779  |
| 39 | Resko         | 1            | 100 326                                     | 108 130  | 112 494  | 107 549  | 115 353  | 119 717  |
| 40 | Rzeszów       | 3            | 104 213                                     | 112 881  | 117 721  | 112 270  | 120 938  | 125 779  |
| 41 | Sandomierz    | 3            | 104 213                                     | 112 881  | 117 721  | 112 270  | 120 938  | 125 779  |
| 42 | Siedlce       | 4            | 106 164                                     | 115 264  | 120 343  | 114 638  | 123 738  | 128 817  |
| 43 | Słubice       | 2            | 102 277                                     | 110 513  | 115 100  | 109 917  | 118 153  | 122 740  |
| 44 | Sulejów       | 2            | 102 277                                     | 110 513  | 115 100  | 112 270  | 118 153  | 122 740  |
| 45 | Suwałki       | 5            | 108 115                                     | 117 632  | 122 949  | 116 991  | 126 523  | 131 840  |

| No | Location     | Climate zone | Energy and heat source investment costs [€] |          |          |          |          |          |
|----|--------------|--------------|---------------------------------------------|----------|----------|----------|----------|----------|
|    |              |              | Class A1                                    | Class A2 | Class A3 | Class B1 | Class B2 | Class B3 |
| 46 | Szczecin     | 1            | 100 326                                     | 108 130  | 112 494  | 107 549  | 115 353  | 119 717  |
| 47 | Szczecinek   | 1            | 100 326                                     | 108 130  | 112 494  | 107 549  | 115 353  | 119 717  |
| 48 | Świnoujście  | 1            | 100 326                                     | 108 130  | 112 494  | 107 549  | 115 353  | 122 740  |
| 49 | Tarnów       | 3            | 104 213                                     | 112 881  | 117 721  | 112 270  | 120 938  | 125 779  |
| 50 | Terespol     | 4            | 106 164                                     | 115 264  | 120 343  | 114 638  | 123 738  | 128 817  |
| 51 | Toruń        | 3            | 104 213                                     | 112 881  | 117 721  | 112 270  | 120 938  | 125 779  |
| 52 | Ustka        | 1            | 100 326                                     | 108 130  | 112 494  | 107 549  | 115 353  | 119 717  |
| 53 | Warszawa     | 3            | 104 213                                     | 112 881  | 117 721  | 112 270  | 120 938  | 125 779  |
| 54 | Wieluń       | 2            | 102 277                                     | 110 513  | 115 100  | 109 917  | 118 153  | 122 740  |
| 55 | Włodawa      | 3            | 104 213                                     | 112 881  | 117 721  | 112 270  | 120 938  | 125 779  |
| 56 | Wrocław      | 2            | 102 277                                     | 110 513  | 115 100  | 109 917  | 118 153  | 122 740  |
| 57 | Zakopane     | 5            | 108 115                                     | 117 632  | 122 949  | 116 991  | 126 523  | 131 840  |
| 58 | Zamość       | 3            | 104 213                                     | 112 881  | 117 721  | 112 270  | 120 938  | 125 779  |
| 59 | Zielona Góra | 2            | 102 277                                     | 110 513  | 115 100  | 109 917  | 118 153  | 122 740  |

**Table S16.** Operating costs [€/( $\text{m}^2 \cdot \text{month}$ )] for the adopted building in six energy classes and 59 locations in Poland.

| No | Location      | Climate zone | Operating costs [€/( $\text{m}^2 \cdot \text{month}$ )] |          |          |          |          |          |
|----|---------------|--------------|---------------------------------------------------------|----------|----------|----------|----------|----------|
|    |               |              | Class A1                                                | Class A2 | Class A3 | Class B1 | Class B2 | Class B3 |
| 1  | Białystok     | 4            | 1.32                                                    | 1.15     | 0.75     | 1.43     | 1.26     | 0.87     |
| 2  | Bielsko-Biała | 3            | 1.22                                                    | 1.04     | 0.62     | 1.32     | 1.13     | 0.72     |
| 3  | Bydgoszcz     | 2            | 1.28                                                    | 1.10     | 0.69     | 1.39     | 1.20     | 0.80     |
| 4  | Chojnice      | 2            | 1.33                                                    | 1.16     | 0.75     | 1.44     | 1.26     | 0.87     |
| 5  | Częstochowa   | 3            | 1.25                                                    | 1.06     | 0.65     | 1.35     | 1.16     | 0.75     |
| 6  | Elbląg        | 2            | 1.29                                                    | 1.12     | 0.71     | 1.40     | 1.22     | 0.82     |
| 7  | Gdańsk        | 1            | 1.25                                                    | 1.06     | 0.64     | 1.34     | 1.16     | 0.74     |
| 8  | Gorzów Wielk. | 2            | 1.29                                                    | 1.10     | 0.68     | 1.38     | 1.19     | 0.78     |
| 9  | Hel           | 1            | 1.25                                                    | 1.07     | 0.65     | 1.35     | 1.16     | 0.76     |
| 10 | Jelenia Góra  | 3            | 1.26                                                    | 1.13     | 0.67     | 1.36     | 1.23     | 0.78     |
| 11 | Kalisz        | 2            | 1.27                                                    | 1.09     | 0.68     | 1.37     | 1.19     | 0.79     |
| 12 | Katowice      | 3            | 1.24                                                    | 1.06     | 0.65     | 1.34     | 1.16     | 0.75     |
| 13 | Kętrzyn       | 4            | 1.33                                                    | 1.15     | 0.75     | 1.43     | 1.25     | 0.86     |
| 14 | Kielce        | 3            | 1.27                                                    | 1.08     | 0.68     | 1.37     | 1.19     | 0.78     |
| 15 | Kłodzko       | 3            | 1.24                                                    | 1.06     | 0.65     | 1.34     | 1.16     | 0.75     |
| 16 | Koło          | 2            | 1.22                                                    | 1.04     | 0.62     | 1.31     | 1.13     | 0.71     |
| 17 | Kołobrzeg     | 1            | 1.26                                                    | 1.09     | 0.66     | 1.36     | 1.17     | 0.76     |
| 18 | Koszalin      | 1            | 1.29                                                    | 1.10     | 0.70     | 1.39     | 1.21     | 0.80     |
| 19 | Kraków        | 3            | 1.23                                                    | 1.05     | 0.64     | 1.33     | 1.15     | 0.69     |
| 20 | Krosno        | 3            | 1.24                                                    | 1.06     | 0.65     | 1.34     | 1.16     | 0.75     |
| 21 | Legnica       | 2            | 1.24                                                    | 1.05     | 0.63     | 1.33     | 1.14     | 0.72     |
| 22 | Lesko         | 4            | 1.21                                                    | 1.02     | 0.61     | 1.30     | 1.12     | 0.70     |
| 23 | Leszno        | 2            | 1.29                                                    | 1.11     | 0.70     | 1.39     | 1.21     | 0.81     |
| 24 | Lębork        | 1            | 1.28                                                    | 1.09     | 0.68     | 1.37     | 1.19     | 0.79     |
| 25 | Lublin        | 3            | 1.28                                                    | 1.10     | 0.69     | 1.38     | 1.20     | 0.80     |
| 26 | Łeba          | 1            | 1.30                                                    | 1.12     | 0.71     | 1.40     | 1.22     | 0.81     |

| No | Location     | Climate zone | Operating costs [€/ (m <sup>2</sup> · month)] |          |          |          |          |          |
|----|--------------|--------------|-----------------------------------------------|----------|----------|----------|----------|----------|
|    |              |              | Class A1                                      | Class A2 | Class A3 | Class B1 | Class B2 | Class B3 |
| 27 | Łódź         | 3            | 1.24                                          | 1.06     | 0.65     | 1.34     | 1.16     | 0.75     |
| 28 | Mikołajki    | 4            | 1.32                                          | 1.15     | 0.74     | 1.43     | 1.25     | 0.86     |
| 29 | Mława        | 3            | 1.31                                          | 1.13     | 0.73     | 1.41     | 1.24     | 0.84     |
| 30 | Nowy Sącz    | 3            | 1.19                                          | 1.01     | 0.58     | 1.28     | 1.10     | 0.68     |
| 31 | Olsztyn      | 4            | 1.32                                          | 1.15     | 0.75     | 1.43     | 1.26     | 0.87     |
| 32 | Opole        | 3            | 1.21                                          | 1.02     | 0.60     | 1.30     | 1.12     | 0.70     |
| 33 | Ostrołęka    | 3            | 1.29                                          | 1.11     | 0.71     | 1.39     | 1.22     | 0.82     |
| 34 | Piła         | 2            | 1.28                                          | 1.09     | 0.67     | 1.37     | 1.19     | 0.79     |
| 35 | Płock        | 3            | 1.28                                          | 1.10     | 0.69     | 1.38     | 1.20     | 0.74     |
| 36 | Poznań       | 2            | 1.26                                          | 1.07     | 0.66     | 1.35     | 1.17     | 0.76     |
| 37 | Przemyśl     | 3            | 1.25                                          | 1.06     | 0.65     | 1.34     | 1.16     | 0.76     |
| 38 | Racibórz     | 3            | 1.19                                          | 1.00     | 0.58     | 1.28     | 1.09     | 0.67     |
| 39 | Resko        | 1            | 1.27                                          | 1.09     | 0.67     | 1.37     | 1.18     | 0.77     |
| 40 | Rzeszów      | 3            | 1.24                                          | 1.06     | 0.65     | 1.34     | 1.16     | 0.76     |
| 41 | Sandomierz   | 3            | 1.22                                          | 1.03     | 0.62     | 1.31     | 1.13     | 0.72     |
| 42 | Siedlce      | 4            | 1.29                                          | 1.12     | 0.71     | 1.40     | 1.22     | 0.82     |
| 43 | Słubice      | 2            | 1.24                                          | 1.05     | 0.63     | 1.33     | 1.15     | 0.72     |
| 44 | Sulejów      | 2            | 1.26                                          | 1.08     | 0.67     | 1.36     | 1.18     | 0.77     |
| 45 | Suwałki      | 5            | 1.36                                          | 1.20     | 0.81     | 1.49     | 1.32     | 0.93     |
| 46 | Szczecin     | 1            | 1.26                                          | 1.07     | 0.65     | 1.35     | 1.16     | 0.75     |
| 47 | Szczecinek   | 1            | 1.29                                          | 1.11     | 0.69     | 1.39     | 1.21     | 0.80     |
| 48 | Świnoujście  | 1            | 1.21                                          | 1.02     | 0.60     | 1.30     | 1.11     | 0.74     |
| 49 | Tarnów       | 3            | 1.19                                          | 1.00     | 0.66     | 1.28     | 1.09     | 0.67     |
| 50 | Terespol     | 4            | 1.28                                          | 1.10     | 0.69     | 1.38     | 1.20     | 0.80     |
| 51 | Toruń        | 3            | 1.29                                          | 1.11     | 0.70     | 1.39     | 1.21     | 0.80     |
| 52 | Ustka        | 1            | 1.27                                          | 1.09     | 0.68     | 1.37     | 1.19     | 0.79     |
| 53 | Warszawa     | 3            | 1.28                                          | 1.06     | 0.65     | 1.35     | 1.16     | 0.76     |
| 54 | Wieluń       | 2            | 1.25                                          | 1.06     | 0.65     | 1.35     | 1.16     | 0.75     |
| 55 | Włodawa      | 3            | 1.29                                          | 1.11     | 0.71     | 1.39     | 1.22     | 0.81     |
| 56 | Wrocław      | 2            | 1.24                                          | 1.05     | 0.64     | 1.33     | 1.15     | 0.74     |
| 57 | Zakopane     | 5            | 1.26                                          | 1.09     | 0.70     | 1.38     | 1.21     | 0.82     |
| 58 | Zamość       | 3            | 1.25                                          | 1.07     | 0.67     | 1.35     | 1.18     | 0.78     |
| 59 | Zielona Góra | 2            | 1.28                                          | 1.10     | 0.69     | 1.38     | 1.20     | 0.79     |

**Table S17.** 10-year LCC costs of heat source [€] for the adopted building in six energy classes and 59 locations in Poland.

| No | Location      | Climate zone | 10-year LCC costs of heat source [€] |          |          |          |          |          |
|----|---------------|--------------|--------------------------------------|----------|----------|----------|----------|----------|
|    |               |              | Class A1                             | Class A2 | Class A3 | Class B1 | Class B2 | Class B3 |
| 1  | Białystok     | 4            | 308 340                              | 291 371  | 235 631  | 334 311  | 316 638  | 261 310  |
| 2  | Bielsko-Biała | 3            | 291 127                              | 271 407  | 213 193  | 313 657  | 294 241  | 235 300  |
| 3  | Bydgoszcz     | 2            | 298 965                              | 279 578  | 221 355  | 322 050  | 302 493  | 245 180  |
| 4  | Chojnice      | 2            | 306 129                              | 287 422  | 230 631  | 330 233  | 311 575  | 255 877  |
| 5  | Częstochowa   | 3            | 295 547                              | 275 936  | 217 565  | 318 344  | 299 292  | 240 994  |
| 6  | Elbląg        | 2            | 300 361                              | 281 424  | 223 880  | 323 968  | 304 763  | 248 142  |
| 7  | Gdańsk        | 1            | 292 194                              | 271 185  | 211 026  | 313 089  | 292 395  | 233 038  |



| No | Location      | Climate zone | 10-year LCC costs of heat source [€] |          |          |          |          |          |
|----|---------------|--------------|--------------------------------------|----------|----------|----------|----------|----------|
|    |               |              | Class A1                             | Class A2 | Class A3 | Class B1 | Class B2 | Class B3 |
| 8  | Gorzów Wielk. | 2            | 299 208                              | 279 165  | 219 776  | 320 993  | 301 121  | 242 254  |
| 9  | Hel           | 1            | 292 182                              | 271 658  | 212 459  | 314 048  | 293 743  | 235 588  |
| 10 | Jelenia Góra  | 3            | 297 052                              | 286 002  | 220 212  | 320 845  | 309 637  | 244 479  |
| 11 | Kalisz        | 2            | 297 010                              | 277 465  | 219 533  | 320 083  | 300 538  | 243 019  |
| 12 | Katowice      | 3            | 294 782                              | 275 147  | 216 921  | 317 555  | 298 587  | 240 363  |
| 13 | Kętrzyn       | 4            | 309 154                              | 291 092  | 234 806  | 333 922  | 315 861  | 259 768  |
| 14 | Kielce        | 3            | 297 938                              | 278 862  | 221 401  | 321 428  | 302 691  | 245 669  |
| 15 | Kłodzko       | 3            | 294 296                              | 274 952  | 216 873  | 317 348  | 298 478  | 240 642  |
| 16 | Koło          | 2            | 289 664                              | 269 185  | 209 504  | 311 146  | 291 116  | 231 897  |
| 17 | Kołobrzeg     | 1            | 293 821                              | 274 390  | 213 795  | 315 602  | 294 897  | 235 831  |
| 18 | Koszalin      | 1            | 298 119                              | 276 199  | 219 356  | 320 580  | 300 288  | 242 035  |
| 19 | Kraków        | 3            | 293 118                              | 273 471  | 215 197  | 315 843  | 296 778  | 231 220  |
| 20 | Krosno        | 3            | 294 162                              | 274 977  | 216 630  | 316 850  | 297 980  | 240 849  |
| 21 | Legnica       | 2            | 291 911                              | 271 067  | 211 107  | 313 077  | 292 913  | 233 086  |
| 22 | Lesko         | 4            | 291 499                              | 271 884  | 213 059  | 314 070  | 295 171  | 236 480  |
| 23 | Leszno        | 2            | 299 645                              | 280 719  | 222 739  | 323 033  | 303 634  | 246 649  |
| 24 | Lębork        | 1            | 295 751                              | 275 592  | 216 867  | 318 006  | 297 859  | 239 996  |
| 25 | Lublin        | 3            | 300 270                              | 281 218  | 223 490  | 323 529  | 304 865  | 247 806  |
| 26 | Łeba          | 1            | 299 236                              | 279 296  | 220 849  | 321 831  | 301 866  | 244 209  |
| 27 | Łódź          | 3            | 294 842                              | 275 353  | 217 042  | 317 470  | 298 502  | 240 606  |
| 28 | Mikołajki     | 4            | 308 110                              | 290 631  | 234 320  | 333 376  | 315 679  | 260 460  |
| 29 | Mława         | 3            | 305 163                              | 286 244  | 229 257  | 328 871  | 310 402  | 253 853  |
| 30 | Nowy Sącz     | 3            | 287 023                              | 267 449  | 207 147  | 308 521  | 288 910  | 230 127  |
| 31 | Olsztyn       | 4            | 308 498                              | 290 752  | 235 000  | 333 534  | 316 006  | 261 335  |
| 32 | Opole         | 3            | 289 925                              | 269 768  | 209 854  | 311 581  | 291 703  | 232 325  |
| 33 | Ostrołęka     | 3            | 302 200                              | 283 100  | 226 428  | 325 860  | 307 451  | 251 109  |
| 34 | Piła          | 2            | 297 557                              | 277 320  | 218 368  | 319 536  | 299 955  | 243 395  |
| 35 | Płock         | 3            | 300 683                              | 281 169  | 222 725  | 323 480  | 304 379  | 238 736  |
| 36 | Poznań        | 2            | 294 837                              | 274 916  | 216 291  | 316 877  | 297 563  | 239 716  |
| 37 | Przemyśl      | 3            | 294 891                              | 275 754  | 217 990  | 318 040  | 299 267  | 242 294  |
| 38 | Racibórz      | 3            | 286 197                              | 266 149  | 206 491  | 308 072  | 288 303  | 229 144  |
| 39 | Resko         | 1            | 295 156                              | 274 390  | 214 997  | 317 059  | 296 366  | 237 009  |
| 40 | Rzeszów       | 3            | 294 004                              | 275 147  | 217 528  | 317 324  | 298 745  | 241 990  |
| 41 | Sandomierz    | 3            | 290 520                              | 270 812  | 212 004  | 312 831  | 293 621  | 235 409  |
| 42 | Siedlce       | 4            | 304 333                              | 286 235  | 229 536  | 328 811  | 310 700  | 254 499  |
| 43 | Słubice       | 2            | 292 846                              | 271 916  | 211 556  | 313 575  | 293 629  | 233 378  |
| 44 | Sulejów       | 2            | 294 740                              | 275 146  | 216 971  | 319 886  | 298 158  | 240 554  |
| 45 | Suwałki       | 5            | 316 593                              | 301 753  | 247 429  | 345 163  | 328 347  | 274 533  |
| 46 | Szczecin      | 1            | 293 056                              | 272 508  | 212 471  | 314 218  | 293 610  | 234 204  |
| 47 | Szczecinek    | 1            | 297 451                              | 277 559  | 218 834  | 319 900  | 299 960  | 242 473  |
| 48 | Świnoujście   | 1            | 285 504                              | 264 203  | 203 693  | 306 265  | 285 329  | 235 940  |
| 49 | Tarnów        | 3            | 286 999                              | 266 307  | 218 038  | 307 938  | 288 461  | 228 379  |
| 50 | Terespol      | 4            | 302 330                              | 283 516  | 225 772  | 325 666  | 307 373  | 250 735  |
| 51 | Toruń         | 3            | 301 727                              | 282 687  | 224 607  | 325 034  | 305 715  | 248 170  |
| 52 | Ustka         | 1            | 295 411                              | 275 568  | 216 527  | 317 775  | 297 726  | 240 008  |

| No | Location     | Climate zone | 10-year LCC costs of heat source [€] |          |          |          |          |          |
|----|--------------|--------------|--------------------------------------|----------|----------|----------|----------|----------|
|    |              |              | Class A1                             | Class A2 | Class A3 | Class B1 | Class B2 | Class B3 |
| 53 | Warszawa     | 3            | 299 833                              | 275 912  | 217 795  | 318 526  | 299 085  | 241 431  |
| 54 | Wieluń       | 2            | 293 598                              | 273 459  | 214 834  | 316 100  | 296 312  | 237 470  |
| 55 | Włodawa      | 3            | 301 957                              | 283 015  | 225 712  | 325 568  | 307 123  | 250 295  |
| 56 | Wrocław      | 2            | 291 619                              | 271 564  | 212 904  | 313 975  | 294 224  | 235 758  |
| 57 | Zakopane     | 5            | 301 780                              | 284 439  | 229 896  | 327 764  | 311 154  | 257 959  |
| 58 | Zamość       | 3            | 295 583                              | 276 846  | 220 139  | 319 752  | 301 162  | 245 159  |
| 59 | Zielona Góra | 2            | 298 892                              | 278 692  | 220 043  | 320 678  | 301 351  | 243 383  |
